# Supplementary material for: Microbial community structure and niche differentiation in healthy and infected samples of Kappaphycus alvarezii in the commercial farming sites of Tamil Nadu coastal, India
Source: Research Square preprint supplement (doi:10.21203/rs.3.rs-7621295/v1), 2025-09-30
Supplement: Supplementary file 1 [file 50bd8b2aed2efa98db94aab4.xlsx]

## Sheet: KaND_vs_KaNH
	KaND	KaNH
Archaea; Thaumarchaeota; Nitrososphaeria; Nitrososphaerales; Nitrososphaeraceae; Candidatus Nitrososphaera	21	0
Archaea; Thaumarchaeota; Nitrososphaeria; Nitrososphaerales; Nitrososphaeraceae; NA	25	0
Bacteria; Acidobacteria; Acidobacteriia; Acidobacteriales; NA; NA	29	0
Bacteria; Acidobacteria; Acidobacteriia; Acidobacteriales; uncultured; NA	24	0
Bacteria; Acidobacteria; Acidobacteriia; Solibacterales; Solibacteraceae (Subgroup 3); Bryobacter	63	0
Bacteria; Acidobacteria; Acidobacteriia; Solibacterales; Solibacteraceae (Subgroup 3); NA	14	0
Bacteria; Acidobacteria; Blastocatellia (Subgroup 4); 11-24; NA; NA	27	0
Bacteria; Acidobacteria; Blastocatellia (Subgroup 4); Blastocatellales; Blastocatellaceae; Blastocatella	23	0
Bacteria; Acidobacteria; Blastocatellia (Subgroup 4); Blastocatellales; Blastocatellaceae; NA	61	0
Bacteria; Acidobacteria; Blastocatellia (Subgroup 4); Pyrinomonadales; Pyrinomonadaceae; RB41	311	0
Bacteria; Acidobacteria; Holophagae; Subgroup 7; NA; NA	34	0
Bacteria; Acidobacteria; NA; NA; NA; NA	16	0
Bacteria; Acidobacteria; Subgroup 11; NA; NA; NA	13	0
Bacteria; Acidobacteria; Subgroup 25; uncultured bacterium; uncultured bacterium; uncultured bacterium	25	0
Bacteria; Acidobacteria; Subgroup 6; NA; NA; NA	572	0
Bacteria; Actinobacteria; Acidimicrobiia; Actinomarinales; uncultured; NA	74	0
Bacteria; Actinobacteria; Acidimicrobiia; IMCC26256; NA; NA	26	0
Bacteria; Actinobacteria; Acidimicrobiia; Microtrichales; Iamiaceae; Iamia	13	0
Bacteria; Actinobacteria; Acidimicrobiia; Microtrichales; Ilumatobacteraceae; Ilumatobacter	24	0
Bacteria; Actinobacteria; Acidimicrobiia; Microtrichales; Ilumatobacteraceae; NA	37	0
Bacteria; Actinobacteria; Acidimicrobiia; Microtrichales; Ilumatobacteraceae; uncultured	12	0
Bacteria; Actinobacteria; Acidimicrobiia; Microtrichales; NA; NA	10	0
Bacteria; Actinobacteria; Acidimicrobiia; Microtrichales; uncultured; NA	28	0
Bacteria; Actinobacteria; Acidimicrobiia; Microtrichales; uncultured; uncultured Acidimicrobidae bacterium	22	0
Bacteria; Actinobacteria; Acidimicrobiia; NA; NA; NA	30	0
Bacteria; Actinobacteria; Actinobacteria; Bifidobacteriales; Bifidobacteriaceae; Bifidobacterium	502	179
Bacteria; Actinobacteria; Actinobacteria; Corynebacteriales; Mycobacteriaceae; Mycobacterium	10	0
Bacteria; Actinobacteria; Actinobacteria; Frankiales; Geodermatophilaceae; NA	10	0
Bacteria; Actinobacteria; Actinobacteria; Frankiales; NA; NA	15	0
Bacteria; Actinobacteria; Actinobacteria; Micrococcales; Microbacteriaceae; Agromyces	39	0
Bacteria; Actinobacteria; Actinobacteria; Micrococcales; Micrococcaceae; NA	346	4
Bacteria; Actinobacteria; Actinobacteria; Micromonosporales; Micromonosporaceae; Micromonospora	43	5
Bacteria; Actinobacteria; Actinobacteria; Micromonosporales; Micromonosporaceae; NA	79	0
Bacteria; Actinobacteria; Actinobacteria; NA; NA; NA	185	0
Bacteria; Actinobacteria; Actinobacteria; Propionibacteriales; Nocardioidaceae; Nocardioides	37	0
Bacteria; Actinobacteria; Actinobacteria; Pseudonocardiales; Pseudonocardiaceae; Pseudonocardia	16	0
Bacteria; Actinobacteria; Actinobacteria; Streptomycetales; Streptomycetaceae; Streptomyces	23	4
Bacteria; Actinobacteria; Actinobacteria; Streptosporangiales; Streptosporangiaceae; Nonomuraea	13	0
Bacteria; Actinobacteria; Coriobacteriia; Coriobacteriales; Atopobiaceae; NA	14	0
Bacteria; Actinobacteria; Coriobacteriia; Coriobacteriales; Atopobiaceae; Olsenella	40	18
Bacteria; Actinobacteria; Coriobacteriia; Coriobacteriales; Coriobacteriaceae; Collinsella	150	47
Bacteria; Actinobacteria; Coriobacteriia; Coriobacteriales; Eggerthellaceae; Enterorhabdus	11	0
Bacteria; Actinobacteria; Coriobacteriia; Coriobacteriales; Eggerthellaceae; Senegalimassilia	53	6
Bacteria; Actinobacteria; Coriobacteriia; Coriobacteriales; Eggerthellaceae; Slackia	23	2
Bacteria; Actinobacteria; MB-A2-108; NA; NA; NA	64	0
Bacteria; Actinobacteria; MB-A2-108; uncultured bacterium; uncultured bacterium; uncultured bacterium	34	0
Bacteria; Actinobacteria; NA; NA; NA; NA	68	0
Bacteria; Actinobacteria; Nitriliruptoria; Euzebyales; Euzebyaceae; NA	17	0
Bacteria; Actinobacteria; Rubrobacteria; Rubrobacterales; Rubrobacteriaceae; Rubrobacter	1641	11
Bacteria; Actinobacteria; Thermoleophilia; Gaiellales; Gaiellaceae; Gaiella	121	0
Bacteria; Actinobacteria; Thermoleophilia; Gaiellales; NA; NA	176	0
Bacteria; Actinobacteria; Thermoleophilia; Gaiellales; uncultured; NA	112	2
Bacteria; Actinobacteria; Thermoleophilia; NA; NA; NA	27	0
Bacteria; Actinobacteria; Thermoleophilia; Solirubrobacterales; 67-14; NA	175	0
Bacteria; Actinobacteria; Thermoleophilia; Solirubrobacterales; 67-14; uncultured Conexibacteraceae bacterium	30	0
Bacteria; Actinobacteria; Thermoleophilia; Solirubrobacterales; NA; NA	23	0
Bacteria; Actinobacteria; Thermoleophilia; Solirubrobacterales; Solirubrobacteraceae; NA	21	0
Bacteria; Actinobacteria; Thermoleophilia; Solirubrobacterales; Solirubrobacteraceae; Solirubrobacter	56	0
Bacteria; Bacteroidetes; Bacteroidia; Bacteroidales; Bacteroidaceae; Bacteroides	12	8
Bacteria; Bacteroidetes; Bacteroidia; Bacteroidales; Muribaculaceae; metagenome	16	3
Bacteria; Bacteroidetes; Bacteroidia; Bacteroidales; Prevotellaceae; NA	31	0
Bacteria; Bacteroidetes; Bacteroidia; Bacteroidales; Prevotellaceae; Prevotella 9	176	315
Bacteria; Bacteroidetes; Bacteroidia; Bacteroidales; Prevotellaceae; uncultured	13	0
Bacteria; Bacteroidetes; Bacteroidia; Bacteroidales; Rikenellaceae; Rikenellaceae RC9 gut group	12	7
Bacteria; Bacteroidetes; Bacteroidia; Chitinophagales; Chitinophagaceae; Flavisolibacter	11	0
Bacteria; Chloroflexi; Anaerolineae; Anaerolineales; Anaerolineaceae; uncultured	10	0
Bacteria; Chloroflexi; Chloroflexia; Chloroflexales; NA; NA	10	0
Bacteria; Chloroflexi; Chloroflexia; Chloroflexales; Roseiflexaceae; uncultured	13	0
Bacteria; Chloroflexi; Chloroflexia; Kallotenuales; AKIW781; NA	13	0
Bacteria; Chloroflexi; Chloroflexia; Kallotenuales; NA; NA	11	0
Bacteria; Chloroflexi; Chloroflexia; Thermomicrobiales; AKYG1722; NA	13	0
Bacteria; Chloroflexi; Chloroflexia; Thermomicrobiales; JG30-KF-CM45; NA	18	0
Bacteria; Chloroflexi; Chloroflexia; Thermomicrobiales; JG30-KF-CM45; uncultured Chloroflexi bacterium	13	0
Bacteria; Chloroflexi; Dehalococcoidia; S085; metagenome; metagenome	11	0
Bacteria; Chloroflexi; Dehalococcoidia; S085; NA; NA	10	0
Bacteria; Chloroflexi; Dehalococcoidia; S085; uncultured bacterium; uncultured bacterium	52	2
Bacteria; Chloroflexi; Gitt-GS-136; NA; NA; NA	11	0
Bacteria; Chloroflexi; JG30-KF-CM66; NA; NA; NA	16	0
Bacteria; Chloroflexi; KD4-96; NA; NA; NA	35	0
Bacteria; Chloroflexi; KD4-96; uncultured bacterium; uncultured bacterium; uncultured bacterium	69	2
Bacteria; Chloroflexi; Ktedonobacteria; C0119; uncultured bacterium; uncultured bacterium	11	0
Bacteria; Chloroflexi; NA; NA; NA; NA	14	0
Bacteria; Chloroflexi; OLB14; NA; NA; NA	11	0
Bacteria; Chloroflexi; TK10; NA; NA; NA	23	0
Bacteria; Entotheonellaeota; Entotheonellia; Entotheonellales; Entotheonellaceae; Candidatus Entotheonella	36	0
Bacteria; Entotheonellaeota; Entotheonellia; Entotheonellales; Entotheonellaceae; uncultured bacterium	82	0
Bacteria; Firmicutes; Bacilli; Bacillales; Bacillaceae; Bacillus	387	8
Bacteria; Firmicutes; Bacilli; Bacillales; NA; NA	31	0
Bacteria; Firmicutes; Bacilli; Bacillales; Paenibacillaceae; Ammoniphilus	107	2
Bacteria; Firmicutes; Bacilli; Bacillales; Paenibacillaceae; NA	44	0
Bacteria; Firmicutes; Bacilli; Lactobacillales; Lactobacillaceae; Lactobacillus	252	1084
Bacteria; Firmicutes; Bacilli; Lactobacillales; Leuconostocaceae; Weissella	7	7
Bacteria; Firmicutes; Bacilli; Lactobacillales; Streptococcaceae; Streptococcus	16	8
Bacteria; Firmicutes; Clostridia; Clostridiales; Christensenellaceae; Christensenellaceae R-7 group	30	0
Bacteria; Firmicutes; Clostridia; Clostridiales; Clostridiaceae 1; Clostridium sensu stricto 1	494	90
Bacteria; Firmicutes; Clostridia; Clostridiales; Clostridiaceae 1; NA	8	3
Bacteria; Firmicutes; Clostridia; Clostridiales; Family XIII; Family XIII AD3011 group	20	8
Bacteria; Firmicutes; Clostridia; Clostridiales; Lachnospiraceae; [Eubacterium] eligens group	18	16
Bacteria; Firmicutes; Clostridia; Clostridiales; Lachnospiraceae; [Eubacterium] hallii group	128	29
Bacteria; Firmicutes; Clostridia; Clostridiales; Lachnospiraceae; Agathobacter	2113	1033
Bacteria; Firmicutes; Clostridia; Clostridiales; Lachnospiraceae; Anaerostipes	23	11
Bacteria; Firmicutes; Clostridia; Clostridiales; Lachnospiraceae; Blautia	321	79
Bacteria; Firmicutes; Clostridia; Clostridiales; Lachnospiraceae; Dorea	123	37
Bacteria; Firmicutes; Clostridia; Clostridiales; Lachnospiraceae; Howardella	14	3
Bacteria; Firmicutes; Clostridia; Clostridiales; Lachnospiraceae; Lachnospira	4	6
Bacteria; Firmicutes; Clostridia; Clostridiales; Lachnospiraceae; NA	356	45
Bacteria; Firmicutes; Clostridia; Clostridiales; Lachnospiraceae; Roseburia	88	86
Bacteria; Firmicutes; Clostridia; Clostridiales; Peptostreptococcaceae; NA	476	67
Bacteria; Firmicutes; Clostridia; Clostridiales; Ruminococcaceae; [Eubacterium] coprostanoligenes group	398	100
Bacteria; Firmicutes; Clostridia; Clostridiales; Ruminococcaceae; Faecalibacterium	392	166
Bacteria; Firmicutes; Clostridia; Clostridiales; Ruminococcaceae; NA	57	13
Bacteria; Firmicutes; Clostridia; Clostridiales; Ruminococcaceae; Ruminococcaceae NK4A214 group	89	35
Bacteria; Firmicutes; Clostridia; Clostridiales; Ruminococcaceae; Ruminococcaceae UCG-002	135	79
Bacteria; Firmicutes; Clostridia; Clostridiales; Ruminococcaceae; Ruminococcaceae UCG-003	4	6
Bacteria; Firmicutes; Clostridia; Clostridiales; Ruminococcaceae; Ruminococcaceae UCG-005	108	37
Bacteria; Firmicutes; Clostridia; Clostridiales; Ruminococcaceae; Ruminococcaceae UCG-014	12	0
Bacteria; Firmicutes; Clostridia; Clostridiales; Ruminococcaceae; Ruminococcus 1	75	24
Bacteria; Firmicutes; Clostridia; Clostridiales; Ruminococcaceae; Subdoligranulum	251	71
Bacteria; Firmicutes; Erysipelotrichia; Erysipelotrichales; Erysipelotrichaceae; Catenibacterium	232	87
Bacteria; Firmicutes; Erysipelotrichia; Erysipelotrichales; Erysipelotrichaceae; Holdemanella	57	8
Bacteria; Firmicutes; Erysipelotrichia; Erysipelotrichales; Erysipelotrichaceae; Turicibacter	84	0
Bacteria; Firmicutes; Negativicutes; Selenomonadales; Veillonellaceae; Dialister	723	437
Bacteria; Firmicutes; Negativicutes; Selenomonadales; Veillonellaceae; Megamonas	28	28
Bacteria; Firmicutes; Negativicutes; Selenomonadales; Veillonellaceae; Megasphaera	193	104
Bacteria; Firmicutes; Negativicutes; Selenomonadales; Veillonellaceae; Mitsuokella	7	13
Bacteria; Gemmatimonadetes; AKAU4049; NA; NA; NA	14	0
Bacteria; Gemmatimonadetes; BD2-11 terrestrial group; NA; NA; NA	54	0
Bacteria; Gemmatimonadetes; Gemmatimonadetes; Gemmatimonadales; Gemmatimonadaceae; Gemmatimonas	18	0
Bacteria; Gemmatimonadetes; Gemmatimonadetes; Gemmatimonadales; Gemmatimonadaceae; NA	217	2
Bacteria; Gemmatimonadetes; Gemmatimonadetes; Gemmatimonadales; Gemmatimonadaceae; uncultured	509	6
Bacteria; Gemmatimonadetes; Longimicrobia; Longimicrobiales; Longimicrobiaceae; uncultured bacterium	31	0
Bacteria; Gemmatimonadetes; S0134 terrestrial group; NA; NA; NA	265	2
Bacteria; Gemmatimonadetes; S0134 terrestrial group; uncultured bacterium; uncultured bacterium; uncultured bacterium	105	3
Bacteria; Gemmatimonadetes; S0134 terrestrial group; uncultured Gemmatimonadetes bacterium; uncultured Gemmatimonadetes bacterium; uncultured Gemmatimonadetes bacterium	21	0
Bacteria; NA; NA; NA; NA; NA	58	0
Bacteria; Nitrospirae; Nitrospira; Nitrospirales; Nitrospiraceae; Nitrospira	135	3
Bacteria; Proteobacteria; Alphaproteobacteria; Acetobacterales; Acetobacteraceae; Acetobacter	57	81
Bacteria; Proteobacteria; Alphaproteobacteria; Acetobacterales; Acetobacteraceae; NA	13	0
Bacteria; Proteobacteria; Alphaproteobacteria; Azospirillales; Azospirillaceae; Azospirillum	14	0
Bacteria; Proteobacteria; Alphaproteobacteria; Azospirillales; Azospirillaceae; Skermanella	10	0
Bacteria; Proteobacteria; Alphaproteobacteria; Azospirillales; uncultured; NA	54	0
Bacteria; Proteobacteria; Alphaproteobacteria; Caulobacterales; Hyphomonadaceae; SWB02	28	0
Bacteria; Proteobacteria; Alphaproteobacteria; Dongiales; Dongiaceae; Dongia	90	0
Bacteria; Proteobacteria; Alphaproteobacteria; NA; NA; NA	57	0
Bacteria; Proteobacteria; Alphaproteobacteria; Rhizobiales; Beijerinckiaceae; Microvirga	83	0
Bacteria; Proteobacteria; Alphaproteobacteria; Rhizobiales; Beijerinckiaceae; NA	73	0
Bacteria; Proteobacteria; Alphaproteobacteria; Rhizobiales; Hyphomicrobiaceae; NA	14	0
Bacteria; Proteobacteria; Alphaproteobacteria; Rhizobiales; Hyphomicrobiaceae; Pedomicrobium	14	0
Bacteria; Proteobacteria; Alphaproteobacteria; Rhizobiales; KF-JG30-B3; NA	20	0
Bacteria; Proteobacteria; Alphaproteobacteria; Rhizobiales; Methyloligellaceae; NA	11	0
Bacteria; Proteobacteria; Alphaproteobacteria; Rhizobiales; Rhizobiaceae; NA	27	0
Bacteria; Proteobacteria; Alphaproteobacteria; Rhizobiales; Rhizobiales Incertae Sedis; Nordella	23	0
Bacteria; Proteobacteria; Alphaproteobacteria; Rhizobiales; Xanthobacteraceae; Bradyrhizobium	44	2
Bacteria; Proteobacteria; Alphaproteobacteria; Rhizobiales; Xanthobacteraceae; Pseudolabrys	12	0
Bacteria; Proteobacteria; Alphaproteobacteria; Rhizobiales; Xanthobacteraceae; uncultured	66	0
Bacteria; Proteobacteria; Alphaproteobacteria; Rhodobacterales; Rhodobacteraceae; NA	33	0
Bacteria; Proteobacteria; Alphaproteobacteria; Rhodobacterales; Rhodobacteraceae; Rubellimicrobium	12	0
Bacteria; Proteobacteria; Alphaproteobacteria; Rhodobacterales; Rhodobacteraceae; Ruegeria	35	0
Bacteria; Proteobacteria; Alphaproteobacteria; Rhodospirillales; NA; NA	12	0
Bacteria; Proteobacteria; Alphaproteobacteria; Sphingomonadales; Sphingomonadaceae; NA	41	0
Bacteria; Proteobacteria; Alphaproteobacteria; Sphingomonadales; Sphingomonadaceae; Sphingomonas	208	0
Bacteria; Proteobacteria; Alphaproteobacteria; Tistrellales; Geminicoccaceae; uncultured	190	0
Bacteria; Proteobacteria; Deltaproteobacteria; Desulfovibrionales; Desulfovibrionaceae; Bilophila	11	2
Bacteria; Proteobacteria; Deltaproteobacteria; Desulfovibrionales; Desulfovibrionaceae; Desulfovibrio	62	7
Bacteria; Proteobacteria; Deltaproteobacteria; Myxococcales; bacteriap25; NA	21	3
Bacteria; Proteobacteria; Deltaproteobacteria; Myxococcales; BIrii41; NA	33	3
Bacteria; Proteobacteria; Deltaproteobacteria; Myxococcales; BIrii41; uncultured bacterium	11	0
Bacteria; Proteobacteria; Deltaproteobacteria; Myxococcales; Haliangiaceae; Haliangium	51	0
Bacteria; Proteobacteria; Deltaproteobacteria; Myxococcales; NA; NA	27	0
Bacteria; Proteobacteria; Deltaproteobacteria; Myxococcales; Nannocystaceae; NA	13	0
Bacteria; Proteobacteria; Deltaproteobacteria; Myxococcales; Polyangiaceae; NA	15	0
Bacteria; Proteobacteria; Deltaproteobacteria; NA; NA; NA	130	0
Bacteria; Proteobacteria; Gammaproteobacteria; Aeromonadales; Aeromonadaceae; Oceanisphaera	242	6
Bacteria; Proteobacteria; Gammaproteobacteria; Alteromonadales; Idiomarinaceae; Idiomarina	33	17
Bacteria; Proteobacteria; Gammaproteobacteria; Alteromonadales; Pseudoalteromonadaceae; Pseudoalteromonas	10585	6190
Bacteria; Proteobacteria; Gammaproteobacteria; Alteromonadales; Shewanellaceae; Shewanella	124	30
Bacteria; Proteobacteria; Gammaproteobacteria; Betaproteobacteriales; Burkholderiaceae; NA	10	0
Bacteria; Proteobacteria; Gammaproteobacteria; Betaproteobacteriales; Burkholderiaceae; Ralstonia	22	4
Bacteria; Proteobacteria; Gammaproteobacteria; Betaproteobacteriales; NA; NA	11	0
Bacteria; Proteobacteria; Gammaproteobacteria; Betaproteobacteriales; Nitrosomonadaceae; MND1	95	0
Bacteria; Proteobacteria; Gammaproteobacteria; Betaproteobacteriales; TRA3-20; uncultured gamma proteobacterium	13	0
Bacteria; Proteobacteria; Gammaproteobacteria; Betaproteobacteriales; TRA3-20; uncultured Nitrosomonadales bacterium	10	0
Bacteria; Proteobacteria; Gammaproteobacteria; CCD24; NA; NA	44	0
Bacteria; Proteobacteria; Gammaproteobacteria; Enterobacteriales; Enterobacteriaceae; Escherichia-Shigella	51	36
Bacteria; Proteobacteria; Gammaproteobacteria; Enterobacteriales; Enterobacteriaceae; NA	11	11
Bacteria; Proteobacteria; Gammaproteobacteria; Gammaproteobacteria Incertae Sedis; Unknown Family; Acidibacter	10	0
Bacteria; Proteobacteria; Gammaproteobacteria; NA; NA; NA	409	123
Bacteria; Proteobacteria; Gammaproteobacteria; Oceanospirillales; Endozoicomonadaceae; Endozoicomonas	7	11
Bacteria; Proteobacteria; Gammaproteobacteria; Oceanospirillales; Halomonadaceae; Cobetia	14159	35884
Bacteria; Proteobacteria; Gammaproteobacteria; Oceanospirillales; Halomonadaceae; Halomonas	1748	7781
Bacteria; Proteobacteria; Gammaproteobacteria; PLTA13; NA; NA	12	0
Bacteria; Proteobacteria; Gammaproteobacteria; Pseudomonadales; Moraxellaceae; Psychrobacter	517	6
Bacteria; Proteobacteria; Gammaproteobacteria; Pseudomonadales; Pseudomonadaceae; Pseudomonas	41	2
Bacteria; Proteobacteria; Gammaproteobacteria; Steroidobacterales; Steroidobacteraceae; NA	97	3
Bacteria; Proteobacteria; Gammaproteobacteria; Steroidobacterales; Steroidobacteraceae; Steroidobacter	24	0
Bacteria; Proteobacteria; Gammaproteobacteria; Steroidobacterales; Steroidobacteraceae; uncultured	10	0
Bacteria; Proteobacteria; Gammaproteobacteria; Vibrionales; Vibrionaceae; Vibrio	2962	29
Bacteria; Proteobacteria; Gammaproteobacteria; Xanthomonadales; Xanthomonadaceae; NA	14	0
Bacteria; Rokubacteria; NC10; Rokubacteriales; NA; NA	12	0
Bacteria; Rokubacteria; NC10; Rokubacteriales; uncultured bacterium; uncultured bacterium	63	0

## Sheet: KaJD_vs_KaJH
	KaJD	KaJH
Bacteria; Acidobacteria; Acidobacteriia; Solibacterales; Solibacteraceae (Subgroup 3); Bryobacter	72	0
Bacteria; Acidobacteria; Blastocatellia (Subgroup 4); 11-24; NA; NA	11	0
Bacteria; Acidobacteria; Blastocatellia (Subgroup 4); Blastocatellales; Blastocatellaceae; NA	24	0
Bacteria; Acidobacteria; Blastocatellia (Subgroup 4); Pyrinomonadales; Pyrinomonadaceae; RB41	32	0
Bacteria; Acidobacteria; Holophagae; Subgroup 7; NA; NA	11	0
Bacteria; Acidobacteria; Subgroup 6; NA; NA; NA	126	12
Bacteria; Actinobacteria; Acidimicrobiia; Actinomarinales; uncultured; NA	67	0
Bacteria; Actinobacteria; Acidimicrobiia; Microtrichales; Iamiaceae; Iamia	12	0
Bacteria; Actinobacteria; Acidimicrobiia; Microtrichales; Ilumatobacteraceae; Ilumatobacter	9	3
Bacteria; Actinobacteria; Acidimicrobiia; Microtrichales; Ilumatobacteraceae; NA	22	0
Bacteria; Actinobacteria; Acidimicrobiia; Microtrichales; NA; NA	7	3
Bacteria; Actinobacteria; Acidimicrobiia; Microtrichales; uncultured; NA	23	0
Bacteria; Actinobacteria; Actinobacteria; Bifidobacteriales; Bifidobacteriaceae; Bifidobacterium	555	250
Bacteria; Actinobacteria; Actinobacteria; Frankiales; NA; NA	16	0
Bacteria; Actinobacteria; Actinobacteria; Micrococcales; Microbacteriaceae; Agromyces	27	2
Bacteria; Actinobacteria; Actinobacteria; Micrococcales; Micrococcaceae; NA	23	0
Bacteria; Actinobacteria; Actinobacteria; Micromonosporales; Micromonosporaceae; Micromonospora	13	1
Bacteria; Actinobacteria; Actinobacteria; Micromonosporales; Micromonosporaceae; NA	34	6
Bacteria; Actinobacteria; Actinobacteria; NA; NA; NA	138	5
Bacteria; Actinobacteria; Actinobacteria; Propionibacteriales; Nocardioidaceae; Nocardioides	30	4
Bacteria; Actinobacteria; Actinobacteria; Streptomycetales; Streptomycetaceae; Streptomyces	11	0
Bacteria; Actinobacteria; Coriobacteriia; Coriobacteriales; Atopobiaceae; Olsenella	31	36
Bacteria; Actinobacteria; Coriobacteriia; Coriobacteriales; Coriobacteriaceae; Collinsella	122	109
Bacteria; Actinobacteria; Coriobacteriia; Coriobacteriales; Eggerthellaceae; Enterorhabdus	17	6
Bacteria; Actinobacteria; Coriobacteriia; Coriobacteriales; Eggerthellaceae; Senegalimassilia	36	23
Bacteria; Actinobacteria; Coriobacteriia; Coriobacteriales; Eggerthellaceae; Slackia	14	11
Bacteria; Actinobacteria; MB-A2-108; NA; NA; NA	13	2
Bacteria; Actinobacteria; NA; NA; NA; NA	13	0
Bacteria; Actinobacteria; Nitriliruptoria; Euzebyales; Euzebyaceae; NA	10	0
Bacteria; Actinobacteria; Rubrobacteria; Rubrobacterales; Rubrobacteriaceae; Rubrobacter	190	15
Bacteria; Actinobacteria; Thermoleophilia; Gaiellales; Gaiellaceae; Gaiella	48	0
Bacteria; Actinobacteria; Thermoleophilia; Gaiellales; NA; NA	12	3
Bacteria; Actinobacteria; Thermoleophilia; Gaiellales; uncultured; NA	33	1
Bacteria; Actinobacteria; Thermoleophilia; Solirubrobacterales; 67-14; NA	10	1
Bacteria; Actinobacteria; Thermoleophilia; Solirubrobacterales; Solirubrobacteraceae; Solirubrobacter	11	0
Bacteria; Bacteroidetes; Bacteroidia; Bacteroidales; Bacteroidaceae; Bacteroides	10	7
Bacteria; Bacteroidetes; Bacteroidia; Bacteroidales; Muribaculaceae; metagenome	29	2
Bacteria; Bacteroidetes; Bacteroidia; Bacteroidales; Prevotellaceae; Alloprevotella	15	10
Bacteria; Bacteroidetes; Bacteroidia; Bacteroidales; Prevotellaceae; NA	50	12
Bacteria; Bacteroidetes; Bacteroidia; Bacteroidales; Prevotellaceae; Prevotella 9	301	184
Bacteria; Bacteroidetes; Bacteroidia; Bacteroidales; Prevotellaceae; uncultured	32	2
Bacteria; Bacteroidetes; Bacteroidia; Bacteroidales; Rikenellaceae; Rikenellaceae RC9 gut group	19	8
Bacteria; Bacteroidetes; Bacteroidia; Chitinophagales; Saprospiraceae; NA	15	0
Bacteria; Bacteroidetes; Bacteroidia; Chitinophagales; Saprospiraceae; uncultured	13	0
Bacteria; Chloroflexi; Chloroflexia; Thermomicrobiales; AKYG1722; NA	10	0
Bacteria; Chloroflexi; JG30-KF-CM66; NA; NA; NA	13	2
Bacteria; Chloroflexi; KD4-96; uncultured bacterium; uncultured bacterium; uncultured bacterium	13	2
Bacteria; Chloroflexi; NA; NA; NA; NA	10	3
Bacteria; Entotheonellaeota; Entotheonellia; Entotheonellales; Entotheonellaceae; Candidatus Entotheonella	38	0
Bacteria; Entotheonellaeota; Entotheonellia; Entotheonellales; Entotheonellaceae; uncultured bacterium	11	0
Bacteria; Firmicutes; Bacilli; Bacillales; Bacillaceae; Bacillus	150	6
Bacteria; Firmicutes; Bacilli; Bacillales; Paenibacillaceae; Ammoniphilus	51	0
Bacteria; Firmicutes; Bacilli; Lactobacillales; Lactobacillaceae; Lactobacillus	304	426
Bacteria; Firmicutes; Bacilli; Lactobacillales; Leuconostocaceae; Weissella	8	15
Bacteria; Firmicutes; Bacilli; Lactobacillales; Streptococcaceae; Streptococcus	28	24
Bacteria; Firmicutes; Clostridia; Clostridiales; Christensenellaceae; Christensenellaceae R-7 group	29	25
Bacteria; Firmicutes; Clostridia; Clostridiales; Clostridiaceae 1; Clostridium sensu stricto 1	551	1576
Bacteria; Firmicutes; Clostridia; Clostridiales; Clostridiaceae 1; NA	7	64
Bacteria; Firmicutes; Clostridia; Clostridiales; Family XIII; Family XIII AD3011 group	21	10
Bacteria; Firmicutes; Clostridia; Clostridiales; Lachnospiraceae; [Eubacterium] eligens group	25	29
Bacteria; Firmicutes; Clostridia; Clostridiales; Lachnospiraceae; [Eubacterium] hallii group	149	122
Bacteria; Firmicutes; Clostridia; Clostridiales; Lachnospiraceae; Agathobacter	2882	2520
Bacteria; Firmicutes; Clostridia; Clostridiales; Lachnospiraceae; Anaerostipes	27	28
Bacteria; Firmicutes; Clostridia; Clostridiales; Lachnospiraceae; Blautia	425	315
Bacteria; Firmicutes; Clostridia; Clostridiales; Lachnospiraceae; Coprococcus 1	9	4
Bacteria; Firmicutes; Clostridia; Clostridiales; Lachnospiraceae; Dorea	185	160
Bacteria; Firmicutes; Clostridia; Clostridiales; Lachnospiraceae; Howardella	15	16
Bacteria; Firmicutes; Clostridia; Clostridiales; Lachnospiraceae; Lachnospira	3	13
Bacteria; Firmicutes; Clostridia; Clostridiales; Lachnospiraceae; NA	503	1889
Bacteria; Firmicutes; Clostridia; Clostridiales; Lachnospiraceae; Roseburia	122	147
Bacteria; Firmicutes; Clostridia; Clostridiales; Peptostreptococcaceae; NA	415	1879
Bacteria; Firmicutes; Clostridia; Clostridiales; Ruminococcaceae; [Eubacterium] coprostanoligenes group	648	372
Bacteria; Firmicutes; Clostridia; Clostridiales; Ruminococcaceae; Butyricicoccus	7	4
Bacteria; Firmicutes; Clostridia; Clostridiales; Ruminococcaceae; Faecalibacterium	529	419
Bacteria; Firmicutes; Clostridia; Clostridiales; Ruminococcaceae; NA	89	56
Bacteria; Firmicutes; Clostridia; Clostridiales; Ruminococcaceae; Ruminococcaceae NK4A214 group	145	101
Bacteria; Firmicutes; Clostridia; Clostridiales; Ruminococcaceae; Ruminococcaceae UCG-002	199	134
Bacteria; Firmicutes; Clostridia; Clostridiales; Ruminococcaceae; Ruminococcaceae UCG-003	7	5
Bacteria; Firmicutes; Clostridia; Clostridiales; Ruminococcaceae; Ruminococcaceae UCG-005	136	75
Bacteria; Firmicutes; Clostridia; Clostridiales; Ruminococcaceae; Ruminococcaceae UCG-014	19	12
Bacteria; Firmicutes; Clostridia; Clostridiales; Ruminococcaceae; Ruminococcus 1	125	105
Bacteria; Firmicutes; Clostridia; Clostridiales; Ruminococcaceae; Subdoligranulum	260	180
Bacteria; Firmicutes; Erysipelotrichia; Erysipelotrichales; Erysipelotrichaceae; Catenibacterium	306	185
Bacteria; Firmicutes; Erysipelotrichia; Erysipelotrichales; Erysipelotrichaceae; Holdemanella	81	54
Bacteria; Firmicutes; Erysipelotrichia; Erysipelotrichales; Erysipelotrichaceae; Turicibacter	68	531
Bacteria; Firmicutes; Negativicutes; Selenomonadales; Veillonellaceae; Allisonella	9	9
Bacteria; Firmicutes; Negativicutes; Selenomonadales; Veillonellaceae; Dialister	993	738
Bacteria; Firmicutes; Negativicutes; Selenomonadales; Veillonellaceae; Megamonas	53	42
Bacteria; Firmicutes; Negativicutes; Selenomonadales; Veillonellaceae; Megasphaera	257	189
Bacteria; Firmicutes; Negativicutes; Selenomonadales; Veillonellaceae; Mitsuokella	8	45
Bacteria; Gemmatimonadetes; BD2-11 terrestrial group; NA; NA; NA	27	0
Bacteria; Gemmatimonadetes; Gemmatimonadetes; Gemmatimonadales; Gemmatimonadaceae; Gemmatimonas	18	0
Bacteria; Gemmatimonadetes; Gemmatimonadetes; Gemmatimonadales; Gemmatimonadaceae; NA	123	4
Bacteria; Gemmatimonadetes; Gemmatimonadetes; Gemmatimonadales; Gemmatimonadaceae; uncultured	136	5
Bacteria; Gemmatimonadetes; Longimicrobia; Longimicrobiales; Longimicrobiaceae; uncultured bacterium	15	0
Bacteria; Gemmatimonadetes; S0134 terrestrial group; NA; NA; NA	151	2
Bacteria; Gemmatimonadetes; S0134 terrestrial group; uncultured bacterium; uncultured bacterium; uncultured bacterium	44	2
Bacteria; Gemmatimonadetes; S0134 terrestrial group; uncultured Gemmatimonadetes bacterium; uncultured Gemmatimonadetes bacterium; uncultured Gemmatimonadetes bacterium	12	0
Bacteria; Nitrospirae; Nitrospira; Nitrospirales; Nitrospiraceae; Nitrospira	65	6
Bacteria; Proteobacteria; Alphaproteobacteria; Acetobacterales; Acetobacteraceae; Acetobacter	44	165
Bacteria; Proteobacteria; Alphaproteobacteria; Azospirillales; Azospirillaceae; Azospirillum	13	3
Bacteria; Proteobacteria; Alphaproteobacteria; Azospirillales; uncultured; NA	40	6
Bacteria; Proteobacteria; Alphaproteobacteria; Caulobacterales; Hyphomonadaceae; SWB02	30	0
Bacteria; Proteobacteria; Alphaproteobacteria; Rhizobiales; Beijerinckiaceae; Microvirga	45	0
Bacteria; Proteobacteria; Alphaproteobacteria; Rhizobiales; Rhizobiaceae; NA	13	0
Bacteria; Proteobacteria; Alphaproteobacteria; Rhizobiales; Xanthobacteraceae; Bradyrhizobium	5	10
Bacteria; Proteobacteria; Alphaproteobacteria; Rhodobacterales; Rhodobacteraceae; NA	77	0
Bacteria; Proteobacteria; Alphaproteobacteria; Rhodobacterales; Rhodobacteraceae; Ruegeria	28	0
Bacteria; Proteobacteria; Alphaproteobacteria; Rhodospirillales; NA; NA	13	0
Bacteria; Proteobacteria; Alphaproteobacteria; Sphingomonadales; Sphingomonadaceae; Sphingomonas	137	0
Bacteria; Proteobacteria; Alphaproteobacteria; Tistrellales; Geminicoccaceae; uncultured	107	0
Bacteria; Proteobacteria; Deltaproteobacteria; Desulfovibrionales; Desulfovibrionaceae; Bilophila	4	6
Bacteria; Proteobacteria; Deltaproteobacteria; Desulfovibrionales; Desulfovibrionaceae; Desulfovibrio	148	10
Bacteria; Proteobacteria; Deltaproteobacteria; Myxococcales; Haliangiaceae; Haliangium	22	0
Bacteria; Proteobacteria; Deltaproteobacteria; Myxococcales; P3OB-42; NA	0	10
Bacteria; Proteobacteria; Deltaproteobacteria; Myxococcales; Sandaracinaceae; uncultured	10	0
Bacteria; Proteobacteria; Deltaproteobacteria; NA; NA; NA	43	0
Bacteria; Proteobacteria; Gammaproteobacteria; Aeromonadales; Aeromonadaceae; Aeromonas	90	15
Bacteria; Proteobacteria; Gammaproteobacteria; Aeromonadales; Aeromonadaceae; Oceanisphaera	335	8
Bacteria; Proteobacteria; Gammaproteobacteria; Alteromonadales; Idiomarinaceae; Idiomarina	38	33
Bacteria; Proteobacteria; Gammaproteobacteria; Alteromonadales; Pseudoalteromonadaceae; Pseudoalteromonas	14344	26225
Bacteria; Proteobacteria; Gammaproteobacteria; Alteromonadales; Shewanellaceae; Shewanella	2151	997
Bacteria; Proteobacteria; Gammaproteobacteria; Betaproteobacteriales; Burkholderiaceae; NA	17	4
Bacteria; Proteobacteria; Gammaproteobacteria; Betaproteobacteriales; Burkholderiaceae; Ralstonia	24	16
Bacteria; Proteobacteria; Gammaproteobacteria; Betaproteobacteriales; NA; NA	12	0
Bacteria; Proteobacteria; Gammaproteobacteria; Betaproteobacteriales; Nitrosomonadaceae; MND1	44	0
Bacteria; Proteobacteria; Gammaproteobacteria; CCD24; NA; NA	73	0
Bacteria; Proteobacteria; Gammaproteobacteria; Enterobacteriales; Enterobacteriaceae; Escherichia-Shigella	83	48
Bacteria; Proteobacteria; Gammaproteobacteria; Enterobacteriales; Enterobacteriaceae; NA	35	21
Bacteria; Proteobacteria; Gammaproteobacteria; Gammaproteobacteria Incertae Sedis; Unknown Family; Acidibacter	10	0
Bacteria; Proteobacteria; Gammaproteobacteria; NA; NA; NA	245	140
Bacteria; Proteobacteria; Gammaproteobacteria; Oceanospirillales; Endozoicomonadaceae; Endozoicomonas	10	7
Bacteria; Proteobacteria; Gammaproteobacteria; Oceanospirillales; Halomonadaceae; Cobetia	5319	11875
Bacteria; Proteobacteria; Gammaproteobacteria; Oceanospirillales; Halomonadaceae; Halomonas	2555	6714
Bacteria; Proteobacteria; Gammaproteobacteria; Pseudomonadales; Moraxellaceae; Acinetobacter	13	0
Bacteria; Proteobacteria; Gammaproteobacteria; Pseudomonadales; Moraxellaceae; Psychrobacter	8746	148
Bacteria; Proteobacteria; Gammaproteobacteria; Pseudomonadales; Pseudomonadaceae; Pseudomonas	44	286
Bacteria; Proteobacteria; Gammaproteobacteria; Steroidobacterales; Steroidobacteraceae; NA	51	0
Bacteria; Proteobacteria; Gammaproteobacteria; Steroidobacterales; Steroidobacteraceae; uncultured	14	0
Bacteria; Proteobacteria; Gammaproteobacteria; Vibrionales; Vibrionaceae; Vibrio	3727	738
Bacteria; Proteobacteria; Gammaproteobacteria; Xanthomonadales; NA; NA	16	0
Bacteria; Proteobacteria; Gammaproteobacteria; Xanthomonadales; Rhodanobacteraceae; NA	10	0
Bacteria; Rokubacteria; NC10; Rokubacteriales; uncultured bacterium; uncultured bacterium	10	0

## Sheet: KaOD_vs_KaOH
	KaOD	KaOH
Archaea; Thaumarchaeota; Nitrososphaeria; Nitrososphaerales; Nitrososphaeraceae; NA	0	22
Bacteria; Acidobacteria; Acidobacteriia; Acidobacteriales; uncultured; NA	5	5
Bacteria; Acidobacteria; Acidobacteriia; Solibacterales; Solibacteraceae (Subgroup 3); Bryobacter	57	56
Bacteria; Acidobacteria; Acidobacteriia; Solibacterales; Solibacteraceae (Subgroup 3); NA	28	23
Bacteria; Acidobacteria; Blastocatellia (Subgroup 4); 11-24; NA; NA	11	27
Bacteria; Acidobacteria; Blastocatellia (Subgroup 4); Blastocatellales; Blastocatellaceae; NA	9	23
Bacteria; Acidobacteria; Blastocatellia (Subgroup 4); Pyrinomonadales; Pyrinomonadaceae; RB41	22	25
Bacteria; Acidobacteria; Holophagae; Subgroup 7; NA; NA	11	4
Bacteria; Acidobacteria; Subgroup 6; NA; NA; NA	121	152
Bacteria; Acidobacteria; Thermoanaerobaculia; Thermoanaerobaculales; Thermoanaerobaculaceae; Subgroup 10	119	0
Bacteria; Acidobacteria; Thermoanaerobaculia; Thermoanaerobaculales; Thermoanaerobaculaceae; Subgroup 23	21	0
Bacteria; Actinobacteria; Acidimicrobiia; Actinomarinales; uncultured; NA	325	86
Bacteria; Actinobacteria; Acidimicrobiia; IMCC26256; NA; NA	3	16
Bacteria; Actinobacteria; Acidimicrobiia; Microtrichales; Iamiaceae; Iamia	6	24
Bacteria; Actinobacteria; Acidimicrobiia; Microtrichales; Ilumatobacteraceae; Ilumatobacter	116	14
Bacteria; Actinobacteria; Acidimicrobiia; Microtrichales; Ilumatobacteraceae; NA	4	37
Bacteria; Actinobacteria; Acidimicrobiia; Microtrichales; NA; NA	28	46
Bacteria; Actinobacteria; Acidimicrobiia; Microtrichales; uncultured; NA	10	24
Bacteria; Actinobacteria; Acidimicrobiia; Microtrichales; uncultured; uncultured Acidimicrobidae bacterium	9	11
Bacteria; Actinobacteria; Acidimicrobiia; NA; NA; NA	22	33
Bacteria; Actinobacteria; Actinobacteria; Bifidobacteriales; Bifidobacteriaceae; Bifidobacterium	145	456
Bacteria; Actinobacteria; Actinobacteria; Frankiales; Geodermatophilaceae; NA	10	15
Bacteria; Actinobacteria; Actinobacteria; Frankiales; NA; NA	14	26
Bacteria; Actinobacteria; Actinobacteria; Micrococcales; Microbacteriaceae; Agromyces	23	68
Bacteria; Actinobacteria; Actinobacteria; Micrococcales; Micrococcaceae; NA	7	41
Bacteria; Actinobacteria; Actinobacteria; Micromonosporales; Micromonosporaceae; Micromonospora	16	32
Bacteria; Actinobacteria; Actinobacteria; Micromonosporales; Micromonosporaceae; NA	32	50
Bacteria; Actinobacteria; Actinobacteria; Micromonosporales; Micromonosporaceae; Virgisporangium	9	7
Bacteria; Actinobacteria; Actinobacteria; NA; NA; NA	292	274
Bacteria; Actinobacteria; Actinobacteria; PeM15; NA; NA	89	0
Bacteria; Actinobacteria; Actinobacteria; Propionibacteriales; Nocardioidaceae; Nocardioides	18	49
Bacteria; Actinobacteria; Actinobacteria; Propionibacteriales; Propionibacteriaceae; uncultured	13	0
Bacteria; Actinobacteria; Actinobacteria; Pseudonocardiales; Pseudonocardiaceae; Pseudonocardia	20	27
Bacteria; Actinobacteria; Actinobacteria; Streptomycetales; Streptomycetaceae; Streptomyces	28	56
Bacteria; Actinobacteria; Actinobacteria; Streptosporangiales; Streptosporangiaceae; Nonomuraea	0	21
Bacteria; Actinobacteria; Coriobacteriia; Coriobacteriales; Atopobiaceae; NA	0	11
Bacteria; Actinobacteria; Coriobacteriia; Coriobacteriales; Atopobiaceae; Olsenella	16	27
Bacteria; Actinobacteria; Coriobacteriia; Coriobacteriales; Coriobacteriaceae; Collinsella	55	164
Bacteria; Actinobacteria; Coriobacteriia; Coriobacteriales; Eggerthellaceae; Enterorhabdus	3	9
Bacteria; Actinobacteria; Coriobacteriia; Coriobacteriales; Eggerthellaceae; Senegalimassilia	8	30
Bacteria; Actinobacteria; Coriobacteriia; Coriobacteriales; Eggerthellaceae; Slackia	11	31
Bacteria; Actinobacteria; MB-A2-108; NA; NA; NA	34	64
Bacteria; Actinobacteria; NA; NA; NA; NA	13	29
Bacteria; Actinobacteria; Nitriliruptoria; Euzebyales; Euzebyaceae; NA	7	12
Bacteria; Actinobacteria; Rubrobacteria; Rubrobacterales; Rubrobacteriaceae; Rubrobacter	172	353
Bacteria; Actinobacteria; Thermoleophilia; Gaiellales; Gaiellaceae; Gaiella	40	76
Bacteria; Actinobacteria; Thermoleophilia; Gaiellales; NA; NA	19	73
Bacteria; Actinobacteria; Thermoleophilia; Gaiellales; uncultured; NA	11	34
Bacteria; Actinobacteria; Thermoleophilia; Solirubrobacterales; 67-14; NA	13	46
Bacteria; Actinobacteria; Thermoleophilia; Solirubrobacterales; NA; NA	4	10
Bacteria; Actinobacteria; Thermoleophilia; Solirubrobacterales; Solirubrobacteraceae; NA	4	13
Bacteria; Actinobacteria; Thermoleophilia; Solirubrobacterales; Solirubrobacteraceae; Solirubrobacter	14	30
Bacteria; Bacteroidetes; Bacteroidia; Bacteroidales; Bacteroidaceae; Bacteroides	19	4
Bacteria; Bacteroidetes; Bacteroidia; Bacteroidales; Muribaculaceae; metagenome	44	5
Bacteria; Bacteroidetes; Bacteroidia; Bacteroidales; Prevotellaceae; Alloprevotella	65	34
Bacteria; Bacteroidetes; Bacteroidia; Bacteroidales; Prevotellaceae; NA	16	17
Bacteria; Bacteroidetes; Bacteroidia; Bacteroidales; Prevotellaceae; Prevotella 2	14	0
Bacteria; Bacteroidetes; Bacteroidia; Bacteroidales; Prevotellaceae; Prevotella 9	330	343
Bacteria; Bacteroidetes; Bacteroidia; Bacteroidales; Prevotellaceae; uncultured	21	10
Bacteria; Bacteroidetes; Bacteroidia; Bacteroidales; Rikenellaceae; Rikenellaceae RC9 gut group	10	15
Bacteria; Bacteroidetes; Bacteroidia; Chitinophagales; Chitinophagaceae; Flavisolibacter	4	11
Bacteria; Bacteroidetes; Bacteroidia; Chitinophagales; Saprospiraceae; NA	19	3
Bacteria; Bacteroidetes; Bacteroidia; Cytophagales; Cyclobacteriaceae; NA	6	6
Bacteria; Bacteroidetes; Bacteroidia; Cytophagales; Microscillaceae; Chryseolinea	7	4
Bacteria; Bacteroidetes; Rhodothermia; Rhodothermales; Rhodothermaceae; uncultured Bacteroidetes bacterium	6	11
Bacteria; Chloroflexi; Anaerolineae; Caldilineales; Caldilineaceae; uncultured	17	0
Bacteria; Chloroflexi; Chloroflexia; Chloroflexales; Roseiflexaceae; uncultured	3	10
Bacteria; Chloroflexi; Chloroflexia; Kallotenuales; AKIW781; NA	4	10
Bacteria; Chloroflexi; Chloroflexia; Kallotenuales; NA; NA	3	8
Bacteria; Chloroflexi; Chloroflexia; Thermomicrobiales; AKYG1722; NA	14	24
Bacteria; Chloroflexi; Chloroflexia; Thermomicrobiales; AKYG1722; uncultured Chloroflexi bacterium	0	12
Bacteria; Chloroflexi; Chloroflexia; Thermomicrobiales; JG30-KF-CM45; NA	3	16
Bacteria; Chloroflexi; Dehalococcoidia; S085; metagenome; metagenome	3	11
Bacteria; Chloroflexi; Dehalococcoidia; S085; NA; NA	5	5
Bacteria; Chloroflexi; Dehalococcoidia; S085; uncultured soil bacterium; uncultured soil bacterium	9	3
Bacteria; Chloroflexi; Gitt-GS-136; NA; NA; NA	5	13
Bacteria; Chloroflexi; JG30-KF-CM66; NA; NA; NA	20	20
Bacteria; Chloroflexi; KD4-96; NA; NA; NA	7	37
Bacteria; Chloroflexi; KD4-96; uncultured bacterium; uncultured bacterium; uncultured bacterium	13	47
Bacteria; Chloroflexi; Ktedonobacteria; C0119; uncultured bacterium; uncultured bacterium	3	8
Bacteria; Chloroflexi; NA; NA; NA; NA	7	21
Bacteria; Cyanobacteria; Oxyphotobacteria; Synechococcales; Cyanobiaceae; Cyanobium PCC-6307	10	0
Bacteria; Entotheonellaeota; Entotheonellia; Entotheonellales; Entotheonellaceae; Candidatus Entotheonella	25	32
Bacteria; Entotheonellaeota; Entotheonellia; Entotheonellales; Entotheonellaceae; uncultured bacterium	8	4
Bacteria; Epsilonbacteraeota; Campylobacteria; Campylobacterales; Arcobacteraceae; Arcobacter	27	0
Bacteria; Epsilonbacteraeota; Campylobacteria; Campylobacterales; Sulfurospirillaceae; Sulfurospirillum	11	0
Bacteria; Firmicutes; Bacilli; Bacillales; Bacillaceae; Bacillus	111	309
Bacteria; Firmicutes; Bacilli; Bacillales; Paenibacillaceae; Ammoniphilus	34	139
Bacteria; Firmicutes; Bacilli; Bacillales; Planococcaceae; Domibacillus	3	8
Bacteria; Firmicutes; Bacilli; Lactobacillales; Lactobacillaceae; Lactobacillus	64	144
Bacteria; Firmicutes; Bacilli; Lactobacillales; Leuconostocaceae; Weissella	4	7
Bacteria; Firmicutes; Bacilli; Lactobacillales; Streptococcaceae; Streptococcus	3	19
Bacteria; Firmicutes; Clostridia; Clostridiales; Christensenellaceae; Christensenellaceae R-7 group	20	23
Bacteria; Firmicutes; Clostridia; Clostridiales; Clostridiaceae 1; Clostridium sensu stricto 1	334	187
Bacteria; Firmicutes; Clostridia; Clostridiales; Family XIII; Family XIII AD3011 group	6	17
Bacteria; Firmicutes; Clostridia; Clostridiales; Lachnospiraceae; [Eubacterium] eligens group	38	18
Bacteria; Firmicutes; Clostridia; Clostridiales; Lachnospiraceae; [Eubacterium] hallii group	67	82
Bacteria; Firmicutes; Clostridia; Clostridiales; Lachnospiraceae; Agathobacter	1727	1848
Bacteria; Firmicutes; Clostridia; Clostridiales; Lachnospiraceae; Anaerostipes	1	17
Bacteria; Firmicutes; Clostridia; Clostridiales; Lachnospiraceae; Blautia	103	186
Bacteria; Firmicutes; Clostridia; Clostridiales; Lachnospiraceae; Coprococcus 1	7	6
Bacteria; Firmicutes; Clostridia; Clostridiales; Lachnospiraceae; Dorea	49	88
Bacteria; Firmicutes; Clostridia; Clostridiales; Lachnospiraceae; Howardella	6	7
Bacteria; Firmicutes; Clostridia; Clostridiales; Lachnospiraceae; Lachnospira	22	12
Bacteria; Firmicutes; Clostridia; Clostridiales; Lachnospiraceae; NA	286	190
Bacteria; Firmicutes; Clostridia; Clostridiales; Lachnospiraceae; Pseudobutyrivibrio	0	10
Bacteria; Firmicutes; Clostridia; Clostridiales; Lachnospiraceae; Roseburia	22	171
Bacteria; Firmicutes; Clostridia; Clostridiales; Peptostreptococcaceae; NA	258	101
Bacteria; Firmicutes; Clostridia; Clostridiales; Ruminococcaceae; [Eubacterium] coprostanoligenes group	182	257
Bacteria; Firmicutes; Clostridia; Clostridiales; Ruminococcaceae; Butyricicoccus	10	16
Bacteria; Firmicutes; Clostridia; Clostridiales; Ruminococcaceae; Faecalibacterium	247	304
Bacteria; Firmicutes; Clostridia; Clostridiales; Ruminococcaceae; NA	53	44
Bacteria; Firmicutes; Clostridia; Clostridiales; Ruminococcaceae; Ruminococcaceae NK4A214 group	92	88
Bacteria; Firmicutes; Clostridia; Clostridiales; Ruminococcaceae; Ruminococcaceae UCG-002	163	135
Bacteria; Firmicutes; Clostridia; Clostridiales; Ruminococcaceae; Ruminococcaceae UCG-003	8	7
Bacteria; Firmicutes; Clostridia; Clostridiales; Ruminococcaceae; Ruminococcaceae UCG-005	100	72
Bacteria; Firmicutes; Clostridia; Clostridiales; Ruminococcaceae; Ruminococcus 1	84	50
Bacteria; Firmicutes; Clostridia; Clostridiales; Ruminococcaceae; Subdoligranulum	160	161
Bacteria; Firmicutes; Erysipelotrichia; Erysipelotrichales; Erysipelotrichaceae; Catenibacterium	117	181
Bacteria; Firmicutes; Erysipelotrichia; Erysipelotrichales; Erysipelotrichaceae; Holdemanella	20	14
Bacteria; Firmicutes; Erysipelotrichia; Erysipelotrichales; Erysipelotrichaceae; Turicibacter	48	0
Bacteria; Firmicutes; Negativicutes; Selenomonadales; Veillonellaceae; Allisonella	2	13
Bacteria; Firmicutes; Negativicutes; Selenomonadales; Veillonellaceae; Dialister	834	1016
Bacteria; Firmicutes; Negativicutes; Selenomonadales; Veillonellaceae; Megamonas	77	54
Bacteria; Firmicutes; Negativicutes; Selenomonadales; Veillonellaceae; Megasphaera	504	312
Bacteria; Firmicutes; Negativicutes; Selenomonadales; Veillonellaceae; Mitsuokella	145	24
Bacteria; Gemmatimonadetes; BD2-11 terrestrial group; NA; NA; NA	28	32
Bacteria; Gemmatimonadetes; Gemmatimonadetes; Gemmatimonadales; Gemmatimonadaceae; Gemmatimonas	8	10
Bacteria; Gemmatimonadetes; Gemmatimonadetes; Gemmatimonadales; Gemmatimonadaceae; Gemmatirosa	9	5
Bacteria; Gemmatimonadetes; Gemmatimonadetes; Gemmatimonadales; Gemmatimonadaceae; NA	91	70
Bacteria; Gemmatimonadetes; Gemmatimonadetes; Gemmatimonadales; Gemmatimonadaceae; uncultured	94	150
Bacteria; Gemmatimonadetes; Longimicrobia; Longimicrobiales; Longimicrobiaceae; NA	12	22
Bacteria; Gemmatimonadetes; Longimicrobia; Longimicrobiales; Longimicrobiaceae; uncultured bacterium	15	24
Bacteria; Gemmatimonadetes; S0134 terrestrial group; NA; NA; NA	163	115
Bacteria; Gemmatimonadetes; S0134 terrestrial group; uncultured bacterium; uncultured bacterium; uncultured bacterium	43	24
Bacteria; Gemmatimonadetes; S0134 terrestrial group; uncultured Gemmatimonadetes bacterium; uncultured Gemmatimonadetes bacterium; uncultured Gemmatimonadetes bacterium	13	3
Bacteria; Latescibacteria; metagenome; metagenome; metagenome; metagenome	10	3
Bacteria; NA; NA; NA; NA; NA	25	5
Bacteria; Nitrospirae; Nitrospira; Nitrospirales; Nitrospiraceae; Nitrospira	61	113
Bacteria; Patescibacteria; Saccharimonadia; Saccharimonadales; NA; NA	25	0
Bacteria; Proteobacteria; Alphaproteobacteria; Acetobacterales; Acetobacteraceae; Acetobacter	43	0
Bacteria; Proteobacteria; Alphaproteobacteria; Acetobacterales; Acetobacteraceae; NA	7	15
Bacteria; Proteobacteria; Alphaproteobacteria; Azospirillales; Azospirillaceae; Azospirillum	8	3
Bacteria; Proteobacteria; Alphaproteobacteria; Azospirillales; Azospirillaceae; NA	7	5
Bacteria; Proteobacteria; Alphaproteobacteria; Azospirillales; Azospirillaceae; Skermanella	8	13
Bacteria; Proteobacteria; Alphaproteobacteria; Azospirillales; uncultured; NA	39	75
Bacteria; Proteobacteria; Alphaproteobacteria; Caulobacterales; Caulobacteraceae; NA	7	7
Bacteria; Proteobacteria; Alphaproteobacteria; Caulobacterales; Hyphomonadaceae; SWB02	9	17
Bacteria; Proteobacteria; Alphaproteobacteria; Dongiales; Dongiaceae; Dongia	25	22
Bacteria; Proteobacteria; Alphaproteobacteria; Elsterales; NA; NA	7	3
Bacteria; Proteobacteria; Alphaproteobacteria; NA; NA; NA	27	19
Bacteria; Proteobacteria; Alphaproteobacteria; Rhizobiales; Beijerinckiaceae; Microvirga	44	97
Bacteria; Proteobacteria; Alphaproteobacteria; Rhizobiales; Beijerinckiaceae; NA	23	41
Bacteria; Proteobacteria; Alphaproteobacteria; Rhizobiales; Devosiaceae; NA	6	7
Bacteria; Proteobacteria; Alphaproteobacteria; Rhizobiales; Hyphomicrobiaceae; NA	3	9
Bacteria; Proteobacteria; Alphaproteobacteria; Rhizobiales; Hyphomicrobiaceae; Pedomicrobium	19	9
Bacteria; Proteobacteria; Alphaproteobacteria; Rhizobiales; Rhizobiaceae; Allorhizobium-Neorhizobium-Pararhizobium-Rhizobium	7	4
Bacteria; Proteobacteria; Alphaproteobacteria; Rhizobiales; Rhizobiaceae; NA	20	45
Bacteria; Proteobacteria; Alphaproteobacteria; Rhizobiales; Rhizobiales Incertae Sedis; Anderseniella	12	0
Bacteria; Proteobacteria; Alphaproteobacteria; Rhizobiales; Rhizobiales Incertae Sedis; Nordella	10	2
Bacteria; Proteobacteria; Alphaproteobacteria; Rhizobiales; Rhodomicrobiaceae; Rhodomicrobium	5	11
Bacteria; Proteobacteria; Alphaproteobacteria; Rhizobiales; Xanthobacteraceae; Bradyrhizobium	13	4
Bacteria; Proteobacteria; Alphaproteobacteria; Rhizobiales; Xanthobacteraceae; NA	4	11
Bacteria; Proteobacteria; Alphaproteobacteria; Rhizobiales; Xanthobacteraceae; uncultured	14	11
Bacteria; Proteobacteria; Alphaproteobacteria; Rhodobacterales; Rhodobacteraceae; Actibacterium	54	0
Bacteria; Proteobacteria; Alphaproteobacteria; Rhodobacterales; Rhodobacteraceae; Amaricoccus	10	13
Bacteria; Proteobacteria; Alphaproteobacteria; Rhodobacterales; Rhodobacteraceae; Celeribacter	11	0
Bacteria; Proteobacteria; Alphaproteobacteria; Rhodobacterales; Rhodobacteraceae; NA	1498	16
Bacteria; Proteobacteria; Alphaproteobacteria; Rhodobacterales; Rhodobacteraceae; Pseudoruegeria	38	0
Bacteria; Proteobacteria; Alphaproteobacteria; Rhodobacterales; Rhodobacteraceae; Rubellimicrobium	11	20
Bacteria; Proteobacteria; Alphaproteobacteria; Rhodobacterales; Rhodobacteraceae; Ruegeria	467	0
Bacteria; Proteobacteria; Alphaproteobacteria; Rhodobacterales; Rhodobacteraceae; Silicimonas	47	0
Bacteria; Proteobacteria; Alphaproteobacteria; Rhodobacterales; Rhodobacteraceae; uncultured	12	0
Bacteria; Proteobacteria; Alphaproteobacteria; Rhodospirillales; NA; NA	22	6
Bacteria; Proteobacteria; Alphaproteobacteria; Rhodovibrionales; Fodinicurvataceae; Fodinicurvata	145	0
Bacteria; Proteobacteria; Alphaproteobacteria; Sphingomonadales; Sphingomonadaceae; NA	8	13
Bacteria; Proteobacteria; Alphaproteobacteria; Sphingomonadales; Sphingomonadaceae; Sphingomonas	245	219
Bacteria; Proteobacteria; Alphaproteobacteria; Tistrellales; Geminicoccaceae; Candidatus Alysiosphaera	14	6
Bacteria; Proteobacteria; Alphaproteobacteria; Tistrellales; Geminicoccaceae; Geminicoccus	5	7
Bacteria; Proteobacteria; Alphaproteobacteria; Tistrellales; Geminicoccaceae; uncultured	133	205
Bacteria; Proteobacteria; Deltaproteobacteria; Desulfobacterales; Desulfobacteraceae; NA	18	0
Bacteria; Proteobacteria; Deltaproteobacteria; Desulfobacterales; Desulfobacteraceae; Sva0081 sediment group	46	0
Bacteria; Proteobacteria; Deltaproteobacteria; Desulfovibrionales; Desulfovibrionaceae; Bilophila	13	8
Bacteria; Proteobacteria; Deltaproteobacteria; Desulfovibrionales; Desulfovibrionaceae; Desulfovibrio	1443	26
Bacteria; Proteobacteria; Deltaproteobacteria; Desulfovibrionales; Desulfovibrionaceae; Halodesulfovibrio	219	0
Bacteria; Proteobacteria; Deltaproteobacteria; Myxococcales; bacteriap25; NA	17	22
Bacteria; Proteobacteria; Deltaproteobacteria; Myxococcales; BIrii41; NA	9	15
Bacteria; Proteobacteria; Deltaproteobacteria; Myxococcales; BIrii41; uncultured bacterium	8	3
Bacteria; Proteobacteria; Deltaproteobacteria; Myxococcales; Haliangiaceae; Haliangium	54	33
Bacteria; Proteobacteria; Deltaproteobacteria; Myxococcales; Myxococcaceae; Myxococcus	4	7
Bacteria; Proteobacteria; Deltaproteobacteria; Myxococcales; NA; NA	20	24
Bacteria; Proteobacteria; Deltaproteobacteria; Myxococcales; Nannocystaceae; NA	5	7
Bacteria; Proteobacteria; Deltaproteobacteria; Myxococcales; Nannocystaceae; Nannocystis	4	21
Bacteria; Proteobacteria; Deltaproteobacteria; Myxococcales; Polyangiaceae; NA	10	4
Bacteria; Proteobacteria; Deltaproteobacteria; Myxococcales; Polyangiaceae; Pajaroellobacter	6	5
Bacteria; Proteobacteria; Deltaproteobacteria; Myxococcales; Polyangiaceae; Polyangium	6	5
Bacteria; Proteobacteria; Deltaproteobacteria; Myxococcales; Polyangiaceae; Sorangium	8	3
Bacteria; Proteobacteria; Deltaproteobacteria; Myxococcales; Sandaracinaceae; uncultured	97	4
Bacteria; Proteobacteria; Deltaproteobacteria; NA; NA; NA	47	93
Bacteria; Proteobacteria; Gammaproteobacteria; 211ds20; uncultured beta proteobacterium; uncultured beta proteobacterium	7	6
Bacteria; Proteobacteria; Gammaproteobacteria; Aeromonadales; Aeromonadaceae; Oceanisphaera	9384	8
Bacteria; Proteobacteria; Gammaproteobacteria; Alteromonadales; Idiomarinaceae; Idiomarina	13	20
Bacteria; Proteobacteria; Gammaproteobacteria; Alteromonadales; Pseudoalteromonadaceae; Pseudoalteromonas	5334	4683
Bacteria; Proteobacteria; Gammaproteobacteria; Alteromonadales; Shewanellaceae; Shewanella	788	28
Bacteria; Proteobacteria; Gammaproteobacteria; Betaproteobacteriales; Burkholderiaceae; NA	52	33
Bacteria; Proteobacteria; Gammaproteobacteria; Betaproteobacteriales; Burkholderiaceae; Ralstonia	27	7
Bacteria; Proteobacteria; Gammaproteobacteria; Betaproteobacteriales; Burkholderiaceae; uncultured	5	8
Bacteria; Proteobacteria; Gammaproteobacteria; Betaproteobacteriales; NA; NA	11	13
Bacteria; Proteobacteria; Gammaproteobacteria; Betaproteobacteriales; Nitrosomonadaceae; MND1	44	55
Bacteria; Proteobacteria; Gammaproteobacteria; Betaproteobacteriales; TRA3-20; NA	7	11
Bacteria; Proteobacteria; Gammaproteobacteria; Betaproteobacteriales; TRA3-20; uncultured gamma proteobacterium	8	17
Bacteria; Proteobacteria; Gammaproteobacteria; Betaproteobacteriales; TRA3-20; uncultured Nitrosomonadales bacterium	17	19
Bacteria; Proteobacteria; Gammaproteobacteria; CCD24; NA; NA	58	35
Bacteria; Proteobacteria; Gammaproteobacteria; Enterobacteriales; Enterobacteriaceae; Escherichia-Shigella	25	43
Bacteria; Proteobacteria; Gammaproteobacteria; Enterobacteriales; Enterobacteriaceae; NA	31	7
Bacteria; Proteobacteria; Gammaproteobacteria; Gammaproteobacteria Incertae Sedis; Unknown Family; Acidibacter	30	17
Bacteria; Proteobacteria; Gammaproteobacteria; Gammaproteobacteria Incertae Sedis; Unknown Family; uncultured	15	0
Bacteria; Proteobacteria; Gammaproteobacteria; NA; NA; NA	436	224
Bacteria; Proteobacteria; Gammaproteobacteria; Oceanospirillales; Endozoicomonadaceae; Endozoicomonas	9	6
Bacteria; Proteobacteria; Gammaproteobacteria; Oceanospirillales; Halomonadaceae; Cobetia	5044	23084
Bacteria; Proteobacteria; Gammaproteobacteria; Oceanospirillales; Halomonadaceae; Halomonas	655	6057
Bacteria; Proteobacteria; Gammaproteobacteria; Pseudomonadales; Moraxellaceae; Psychrobacter	3331	12
Bacteria; Proteobacteria; Gammaproteobacteria; Pseudomonadales; Pseudomonadaceae; Pseudomonas	40	55
Bacteria; Proteobacteria; Gammaproteobacteria; Steroidobacterales; Steroidobacteraceae; NA	55	42
Bacteria; Proteobacteria; Gammaproteobacteria; Steroidobacterales; Steroidobacteraceae; Steroidobacter	24	24
Bacteria; Proteobacteria; Gammaproteobacteria; Steroidobacterales; Steroidobacteraceae; uncultured	3	7
Bacteria; Proteobacteria; Gammaproteobacteria; Vibrionales; Vibrionaceae; Vibrio	4541	26
Bacteria; Proteobacteria; Gammaproteobacteria; Xanthomonadales; NA; NA	15	27
Bacteria; Proteobacteria; Gammaproteobacteria; Xanthomonadales; Rhodanobacteraceae; NA	7	4
Bacteria; Proteobacteria; Gammaproteobacteria; Xanthomonadales; Xanthomonadaceae; Lysobacter	24	35
Bacteria; Proteobacteria; Gammaproteobacteria; Xanthomonadales; Xanthomonadaceae; NA	23	13
Bacteria; Rokubacteria; NC10; Rokubacteriales; NA; NA	5	5
Bacteria; Rokubacteria; NC10; Rokubacteriales; uncultured bacterium; uncultured bacterium	7	5

## Sheet: KaMD_vs_KaMH
	KaMD	KaMH
Bacteria; Acidobacteria; Acidobacteriia; Acidobacteriales; Acidobacteriaceae (Subgroup 1); Acidicapsa	55	0
Bacteria; Acidobacteria; Acidobacteriia; Acidobacteriales; Acidobacteriaceae (Subgroup 1); Edaphobacter	11	0
Bacteria; Acidobacteria; Acidobacteriia; Acidobacteriales; Acidobacteriaceae (Subgroup 1); Granulicella	259	0
Bacteria; Acidobacteria; Acidobacteriia; Acidobacteriales; Acidobacteriaceae (Subgroup 1); NA	125	0
Bacteria; Acidobacteria; Acidobacteriia; Acidobacteriales; Acidobacteriaceae (Subgroup 1); Terriglobus	412	0
Bacteria; Acidobacteria; Acidobacteriia; Solibacterales; Solibacteraceae (Subgroup 3); Bryobacter	41	0
Bacteria; Acidobacteria; Acidobacteriia; Solibacterales; Solibacteraceae (Subgroup 3); NA	20	2
Bacteria; Acidobacteria; Blastocatellia (Subgroup 4); Blastocatellales; Blastocatellaceae; NA	14	0
Bacteria; Acidobacteria; Blastocatellia (Subgroup 4); Pyrinomonadales; Pyrinomonadaceae; RB41	35	0
Bacteria; Acidobacteria; Subgroup 6; NA; NA; NA	137	0
Bacteria; Actinobacteria; Acidimicrobiia; Actinomarinales; uncultured; NA	42	0
Bacteria; Actinobacteria; Acidimicrobiia; Microtrichales; Iamiaceae; Iamia	13	0
Bacteria; Actinobacteria; Acidimicrobiia; Microtrichales; Ilumatobacteraceae; Ilumatobacter	11	0
Bacteria; Actinobacteria; Acidimicrobiia; Microtrichales; NA; NA	13	0
Bacteria; Actinobacteria; Acidimicrobiia; Microtrichales; uncultured; uncultured Acidimicrobidae bacterium	18	0
Bacteria; Actinobacteria; Actinobacteria; Bifidobacteriales; Bifidobacteriaceae; Bifidobacterium	271	179
Bacteria; Actinobacteria; Actinobacteria; Corynebacteriales; Mycobacteriaceae; Mycobacterium	36	0
Bacteria; Actinobacteria; Actinobacteria; Frankiales; NA; NA	24	3
Bacteria; Actinobacteria; Actinobacteria; Micrococcales; Microbacteriaceae; Agromyces	18	0
Bacteria; Actinobacteria; Actinobacteria; Micrococcales; Microbacteriaceae; NA	104	0
Bacteria; Actinobacteria; Actinobacteria; Micrococcales; Micrococcaceae; NA	19	3
Bacteria; Actinobacteria; Actinobacteria; Micromonosporales; Micromonosporaceae; Micromonospora	48	0
Bacteria; Actinobacteria; Actinobacteria; Micromonosporales; Micromonosporaceae; NA	16	0
Bacteria; Actinobacteria; Actinobacteria; NA; NA; NA	126	7
Bacteria; Actinobacteria; Actinobacteria; Propionibacteriales; Nocardioidaceae; Nocardioides	76	2
Bacteria; Actinobacteria; Coriobacteriia; Coriobacteriales; Coriobacteriaceae; Collinsella	38	47
Bacteria; Actinobacteria; Coriobacteriia; Coriobacteriales; Eggerthellaceae; Slackia	9	3
Bacteria; Actinobacteria; Rubrobacteria; Rubrobacterales; Rubrobacteriaceae; Rubrobacter	232	10
Bacteria; Actinobacteria; Thermoleophilia; Gaiellales; Gaiellaceae; Gaiella	38	0
Bacteria; Actinobacteria; Thermoleophilia; Gaiellales; NA; NA	10	0
Bacteria; Actinobacteria; Thermoleophilia; Solirubrobacterales; 67-14; NA	141	0
Bacteria; Actinobacteria; Thermoleophilia; Solirubrobacterales; Solirubrobacteraceae; NA	251	3
Bacteria; Bacteroidetes; Bacteroidia; Bacteroidales; Bacteroidaceae; Bacteroides	7	4
Bacteria; Bacteroidetes; Bacteroidia; Bacteroidales; Muribaculaceae; metagenome	15	0
Bacteria; Bacteroidetes; Bacteroidia; Bacteroidales; Prevotellaceae; Alloprevotella	49	20
Bacteria; Bacteroidetes; Bacteroidia; Bacteroidales; Prevotellaceae; NA	11	0
Bacteria; Bacteroidetes; Bacteroidia; Bacteroidales; Prevotellaceae; Prevotella 2	18	0
Bacteria; Bacteroidetes; Bacteroidia; Bacteroidales; Prevotellaceae; Prevotella 9	292	352
Bacteria; Bacteroidetes; Bacteroidia; Bacteroidales; Prevotellaceae; uncultured	19	0
Bacteria; Bacteroidetes; Bacteroidia; Chitinophagales; Saprospiraceae; NA	13	0
Bacteria; Bacteroidetes; Bacteroidia; Flavobacteriales; Flavobacteriaceae; Tenacibaculum	46	0
Bacteria; Bacteroidetes; Bacteroidia; Sphingobacteriales; Sphingobacteriaceae; Mucilaginibacter	17	0
Bacteria; Chloroflexi; Chloroflexia; Thermomicrobiales; AKYG1722; NA	11	0
Bacteria; Chloroflexi; TK10; NA; NA; NA	10	0
Bacteria; Cyanobacteria; Oxyphotobacteria; Chloroplast; NA; NA	21	0
Bacteria; Deinococcus-Thermus; Deinococci; Thermales; Thermaceae; Thermus	12	0
Bacteria; Entotheonellaeota; Entotheonellia; Entotheonellales; Entotheonellaceae; Candidatus Entotheonella	31	0
Bacteria; Firmicutes; Bacilli; Bacillales; Bacillaceae; Bacillus	79	0
Bacteria; Firmicutes; Bacilli; Bacillales; Paenibacillaceae; Ammoniphilus	46	0
Bacteria; Firmicutes; Bacilli; Lactobacillales; Lactobacillaceae; Lactobacillus	38	29
Bacteria; Firmicutes; Bacilli; Lactobacillales; Leuconostocaceae; Weissella	4	7
Bacteria; Firmicutes; Clostridia; Clostridiales; Christensenellaceae; Christensenellaceae R-7 group	18	7
Bacteria; Firmicutes; Clostridia; Clostridiales; Clostridiaceae 1; Clostridium sensu stricto 1	154	69
Bacteria; Firmicutes; Clostridia; Clostridiales; Lachnospiraceae; [Eubacterium] eligens group	34	9
Bacteria; Firmicutes; Clostridia; Clostridiales; Lachnospiraceae; [Eubacterium] hallii group	5	32
Bacteria; Firmicutes; Clostridia; Clostridiales; Lachnospiraceae; Agathobacter	1531	775
Bacteria; Firmicutes; Clostridia; Clostridiales; Lachnospiraceae; Blautia	12	56
Bacteria; Firmicutes; Clostridia; Clostridiales; Lachnospiraceae; Dorea	48	34
Bacteria; Firmicutes; Clostridia; Clostridiales; Lachnospiraceae; NA	268	45
Bacteria; Firmicutes; Clostridia; Clostridiales; Lachnospiraceae; Roseburia	198	78
Bacteria; Firmicutes; Clostridia; Clostridiales; Peptostreptococcaceae; NA	249	37
Bacteria; Firmicutes; Clostridia; Clostridiales; Ruminococcaceae; [Eubacterium] coprostanoligenes group	366	46
Bacteria; Firmicutes; Clostridia; Clostridiales; Ruminococcaceae; Faecalibacterium	323	153
Bacteria; Firmicutes; Clostridia; Clostridiales; Ruminococcaceae; Fournierella	14	3
Bacteria; Firmicutes; Clostridia; Clostridiales; Ruminococcaceae; NA	31	12
Bacteria; Firmicutes; Clostridia; Clostridiales; Ruminococcaceae; Ruminococcaceae NK4A214 group	53	32
Bacteria; Firmicutes; Clostridia; Clostridiales; Ruminococcaceae; Ruminococcaceae UCG-002	141	65
Bacteria; Firmicutes; Clostridia; Clostridiales; Ruminococcaceae; Ruminococcaceae UCG-003	11	0
Bacteria; Firmicutes; Clostridia; Clostridiales; Ruminococcaceae; Ruminococcaceae UCG-005	58	23
Bacteria; Firmicutes; Clostridia; Clostridiales; Ruminococcaceae; Ruminococcus 1	23	24
Bacteria; Firmicutes; Clostridia; Clostridiales; Ruminococcaceae; Subdoligranulum	44	55
Bacteria; Firmicutes; Erysipelotrichia; Erysipelotrichales; Erysipelotrichaceae; Catenibacterium	123	42
Bacteria; Firmicutes; Erysipelotrichia; Erysipelotrichales; Erysipelotrichaceae; Turicibacter	60	0
Bacteria; Firmicutes; Negativicutes; Selenomonadales; Veillonellaceae; Allisonella	21	0
Bacteria; Firmicutes; Negativicutes; Selenomonadales; Veillonellaceae; Dialister	626	320
Bacteria; Firmicutes; Negativicutes; Selenomonadales; Veillonellaceae; Megasphaera	90	66
Bacteria; Firmicutes; Negativicutes; Selenomonadales; Veillonellaceae; Mitsuokella	108	8
Bacteria; Gemmatimonadetes; BD2-11 terrestrial group; NA; NA; NA	20	0
Bacteria; Gemmatimonadetes; Gemmatimonadetes; Gemmatimonadales; Gemmatimonadaceae; Gemmatimonas	11	2
Bacteria; Gemmatimonadetes; Gemmatimonadetes; Gemmatimonadales; Gemmatimonadaceae; NA	89	0
Bacteria; Gemmatimonadetes; Gemmatimonadetes; Gemmatimonadales; Gemmatimonadaceae; uncultured	96	2
Bacteria; Gemmatimonadetes; Longimicrobia; Longimicrobiales; Longimicrobiaceae; uncultured bacterium	10	0
Bacteria; Gemmatimonadetes; S0134 terrestrial group; NA; NA; NA	161	0
Bacteria; Gemmatimonadetes; S0134 terrestrial group; uncultured bacterium; uncultured bacterium; uncultured bacterium	39	2
Bacteria; Gemmatimonadetes; S0134 terrestrial group; uncultured Gemmatimonadetes bacterium; uncultured Gemmatimonadetes bacterium; uncultured Gemmatimonadetes bacterium	10	0
Bacteria; Nitrospirae; Nitrospira; Nitrospirales; Nitrospiraceae; Nitrospira	58	0
Bacteria; Proteobacteria; Alphaproteobacteria; Acetobacterales; Acetobacteraceae; Acetobacter	28	0
Bacteria; Proteobacteria; Alphaproteobacteria; Acetobacterales; Acetobacteraceae; Acidisoma	296	0
Bacteria; Proteobacteria; Alphaproteobacteria; Acetobacterales; Acetobacteraceae; NA	252	0
Bacteria; Proteobacteria; Alphaproteobacteria; Azospirillales; Azospirillaceae; Azospirillum	2384	2
Bacteria; Proteobacteria; Alphaproteobacteria; Azospirillales; Inquilinaceae; Inquilinus	49	0
Bacteria; Proteobacteria; Alphaproteobacteria; Azospirillales; uncultured; NA	61	0
Bacteria; Proteobacteria; Alphaproteobacteria; Caulobacterales; Caulobacteraceae; Asticcacaulis	11	0
Bacteria; Proteobacteria; Alphaproteobacteria; Caulobacterales; Caulobacteraceae; NA	158	0
Bacteria; Proteobacteria; Alphaproteobacteria; Caulobacterales; Caulobacteraceae; uncultured	114	0
Bacteria; Proteobacteria; Alphaproteobacteria; Caulobacterales; Hyphomonadaceae; SWB02	37	0
Bacteria; Proteobacteria; Alphaproteobacteria; Dongiales; Dongiaceae; Dongia	13	0
Bacteria; Proteobacteria; Alphaproteobacteria; Micavibrionales; Micavibrionaceae; uncultured	17	0
Bacteria; Proteobacteria; Alphaproteobacteria; Micropepsales; Micropepsaceae; uncultured	11	0
Bacteria; Proteobacteria; Alphaproteobacteria; NA; NA; NA	12	0
Bacteria; Proteobacteria; Alphaproteobacteria; Rhizobiales; Beijerinckiaceae; 1174-901-12	98	0
Bacteria; Proteobacteria; Alphaproteobacteria; Rhizobiales; Beijerinckiaceae; Methylobacterium	163	0
Bacteria; Proteobacteria; Alphaproteobacteria; Rhizobiales; Beijerinckiaceae; Methylorosula	97	0
Bacteria; Proteobacteria; Alphaproteobacteria; Rhizobiales; Beijerinckiaceae; Microvirga	56	0
Bacteria; Proteobacteria; Alphaproteobacteria; Rhizobiales; Beijerinckiaceae; NA	45	0
Bacteria; Proteobacteria; Alphaproteobacteria; Rhizobiales; Devosiaceae; NA	17	0
Bacteria; Proteobacteria; Alphaproteobacteria; Rhizobiales; Kaistiaceae; Kaistia	26	0
Bacteria; Proteobacteria; Alphaproteobacteria; Rhizobiales; NA; NA	122	0
Bacteria; Proteobacteria; Alphaproteobacteria; Rhizobiales; Rhizobiaceae; Allorhizobium-Neorhizobium-Pararhizobium-Rhizobium	76	0
Bacteria; Proteobacteria; Alphaproteobacteria; Rhizobiales; Rhizobiaceae; NA	35	13
Bacteria; Proteobacteria; Alphaproteobacteria; Rhizobiales; Rhodomicrobiaceae; Rhodomicrobium	16	0
Bacteria; Proteobacteria; Alphaproteobacteria; Rhizobiales; Xanthobacteraceae; Bradyrhizobium	410	0
Bacteria; Proteobacteria; Alphaproteobacteria; Rhodobacterales; Rhodobacteraceae; NA	247	0
Bacteria; Proteobacteria; Alphaproteobacteria; Rhodobacterales; Rhodobacteraceae; Nautella	11	0
Bacteria; Proteobacteria; Alphaproteobacteria; Rhodobacterales; Rhodobacteraceae; Ruegeria	24	0
Bacteria; Proteobacteria; Alphaproteobacteria; Rhodospirillales; NA; NA	15	0
Bacteria; Proteobacteria; Alphaproteobacteria; Sphingomonadales; Sphingomonadaceae; NA	13	0
Bacteria; Proteobacteria; Alphaproteobacteria; Sphingomonadales; Sphingomonadaceae; Sphingomonas	1518	0
Bacteria; Proteobacteria; Alphaproteobacteria; Tistrellales; Geminicoccaceae; Candidatus Alysiosphaera	12	0
Bacteria; Proteobacteria; Alphaproteobacteria; Tistrellales; Geminicoccaceae; uncultured	116	0
Bacteria; Proteobacteria; Deltaproteobacteria; Desulfovibrionales; Desulfovibrionaceae; Bilophila	5	10
Bacteria; Proteobacteria; Deltaproteobacteria; Desulfovibrionales; Desulfovibrionaceae; Desulfovibrio	44	14
Bacteria; Proteobacteria; Deltaproteobacteria; Myxococcales; BIrii41; NA	11	0
Bacteria; Proteobacteria; Deltaproteobacteria; Myxococcales; Haliangiaceae; Haliangium	40	2
Bacteria; Proteobacteria; Deltaproteobacteria; Myxococcales; Nannocystaceae; Nannocystis	13	0
Bacteria; Proteobacteria; Deltaproteobacteria; Myxococcales; Polyangiaceae; Minicystis	92	0
Bacteria; Proteobacteria; Deltaproteobacteria; Myxococcales; Polyangiaceae; Pajaroellobacter	12	0
Bacteria; Proteobacteria; Deltaproteobacteria; NA; NA; NA	18	0
Bacteria; Proteobacteria; Gammaproteobacteria; Aeromonadales; Aeromonadaceae; Oceanisphaera	163	7
Bacteria; Proteobacteria; Gammaproteobacteria; Alteromonadales; Alteromonadaceae; Alteromonas	61	0
Bacteria; Proteobacteria; Gammaproteobacteria; Alteromonadales; Idiomarinaceae; Idiomarina	19	14
Bacteria; Proteobacteria; Gammaproteobacteria; Alteromonadales; Pseudoalteromonadaceae; Pseudoalteromonas	889	481
Bacteria; Proteobacteria; Gammaproteobacteria; Alteromonadales; Shewanellaceae; Shewanella	69	21
Bacteria; Proteobacteria; Gammaproteobacteria; Betaproteobacteriales; Burkholderiaceae; Aquabacterium	14	0
Bacteria; Proteobacteria; Gammaproteobacteria; Betaproteobacteriales; Burkholderiaceae; Burkholderia-Caballeronia-Paraburkholderia	118	0
Bacteria; Proteobacteria; Gammaproteobacteria; Betaproteobacteriales; Burkholderiaceae; NA	120	0
Bacteria; Proteobacteria; Gammaproteobacteria; Betaproteobacteriales; Burkholderiaceae; Pelomonas	31	0
Bacteria; Proteobacteria; Gammaproteobacteria; Betaproteobacteriales; Burkholderiaceae; Ralstonia	26	0
Bacteria; Proteobacteria; Gammaproteobacteria; CCD24; NA; NA	45	0
Bacteria; Proteobacteria; Gammaproteobacteria; Enterobacteriales; Enterobacteriaceae; Escherichia-Shigella	7	21
Bacteria; Proteobacteria; Gammaproteobacteria; Enterobacteriales; Enterobacteriaceae; NA	4	13
Bacteria; Proteobacteria; Gammaproteobacteria; Enterobacteriales; Enterobacteriaceae; Serratia	13	0
Bacteria; Proteobacteria; Gammaproteobacteria; Gammaproteobacteria Incertae Sedis; Unknown Family; Acidibacter	27	0
Bacteria; Proteobacteria; Gammaproteobacteria; NA; NA; NA	335	89
Bacteria; Proteobacteria; Gammaproteobacteria; Oceanospirillales; Endozoicomonadaceae; Endozoicomonas	5	7
Bacteria; Proteobacteria; Gammaproteobacteria; Oceanospirillales; Halomonadaceae; Cobetia	13254	50350
Bacteria; Proteobacteria; Gammaproteobacteria; Oceanospirillales; Halomonadaceae; Halomonas	3971	5402
Bacteria; Proteobacteria; Gammaproteobacteria; Oceanospirillales; Halomonadaceae; NA	114	0
Bacteria; Proteobacteria; Gammaproteobacteria; Oceanospirillales; Saccharospirillaceae; Reinekea	43	0
Bacteria; Proteobacteria; Gammaproteobacteria; Pseudomonadales; Moraxellaceae; Psychrobacter	468	20
Bacteria; Proteobacteria; Gammaproteobacteria; Pseudomonadales; Pseudomonadaceae; Pseudomonas	51	0
Bacteria; Proteobacteria; Gammaproteobacteria; Steroidobacterales; Steroidobacteraceae; NA	45	0
Bacteria; Proteobacteria; Gammaproteobacteria; Vibrionales; Vibrionaceae; NA	24	0
Bacteria; Proteobacteria; Gammaproteobacteria; Vibrionales; Vibrionaceae; Vibrio	712	22
Bacteria; Proteobacteria; Gammaproteobacteria; Xanthomonadales; NA; NA	13	0
Bacteria; Proteobacteria; Gammaproteobacteria; Xanthomonadales; Rhodanobacteraceae; Luteibacter	10	0
Bacteria; Proteobacteria; Gammaproteobacteria; Xanthomonadales; Rhodanobacteraceae; NA	10	0
Bacteria; Proteobacteria; Gammaproteobacteria; Xanthomonadales; Xanthomonadaceae; Lysobacter	12	0
Bacteria; WPS-2; uncultured bacterium; uncultured bacterium; uncultured bacterium; uncultured bacterium	25	0

## Sheet: KaSD_vs_KaSH
	KaSD	KaSH
Bacteria; Acidobacteria; Acidobacteriia; Acidobacteriales; uncultured; NA	11	0
Bacteria; Acidobacteria; Acidobacteriia; Solibacterales; Solibacteraceae (Subgroup 3); Bryobacter	25	0
Bacteria; Acidobacteria; Acidobacteriia; Solibacterales; Solibacteraceae (Subgroup 3); NA	13	0
Bacteria; Acidobacteria; Blastocatellia (Subgroup 4); Blastocatellales; Blastocatellaceae; NA	14	0
Bacteria; Acidobacteria; Blastocatellia (Subgroup 4); Pyrinomonadales; Pyrinomonadaceae; RB41	24	0
Bacteria; Acidobacteria; Subgroup 6; NA; NA; NA	114	4
Bacteria; Actinobacteria; Acidimicrobiia; Actinomarinales; uncultured; NA	41	4
Bacteria; Actinobacteria; Acidimicrobiia; Microtrichales; Iamiaceae; Iamia	11	0
Bacteria; Actinobacteria; Acidimicrobiia; Microtrichales; Ilumatobacteraceae; Ilumatobacter	27	2
Bacteria; Actinobacteria; Acidimicrobiia; Microtrichales; Ilumatobacteraceae; NA	11	3
Bacteria; Actinobacteria; Acidimicrobiia; Microtrichales; Ilumatobacteraceae; uncultured	10	0
Bacteria; Actinobacteria; Actinobacteria; Bifidobacteriales; Bifidobacteriaceae; Bifidobacterium	88	168
Bacteria; Actinobacteria; Actinobacteria; Micrococcales; Microbacteriaceae; Agromyces	12	0
Bacteria; Actinobacteria; Actinobacteria; Micrococcales; Micrococcaceae; NA	27	0
Bacteria; Actinobacteria; Actinobacteria; Micromonosporales; Micromonosporaceae; Micromonospora	15	0
Bacteria; Actinobacteria; Actinobacteria; Micromonosporales; Micromonosporaceae; NA	22	0
Bacteria; Actinobacteria; Actinobacteria; NA; NA; NA	106	0
Bacteria; Actinobacteria; Actinobacteria; Propionibacteriales; Nocardioidaceae; Nocardioides	18	0
Bacteria; Actinobacteria; Actinobacteria; Streptomycetales; Streptomycetaceae; Streptomyces	11	0
Bacteria; Actinobacteria; Coriobacteriia; Coriobacteriales; Atopobiaceae; Olsenella	4	11
Bacteria; Actinobacteria; Coriobacteriia; Coriobacteriales; Coriobacteriaceae; Collinsella	24	35
Bacteria; Actinobacteria; Coriobacteriia; Coriobacteriales; Eggerthellaceae; Slackia	8	6
Bacteria; Actinobacteria; MB-A2-108; NA; NA; NA	10	2
Bacteria; Actinobacteria; Rubrobacteria; Rubrobacterales; Rubrobacteriaceae; Rubrobacter	182	12
Bacteria; Actinobacteria; Thermoleophilia; Gaiellales; Gaiellaceae; Gaiella	19	0
Bacteria; Bacteroidetes; Bacteroidia; Bacteroidales; Marinilabiliaceae; Carboxylicivirga	11	0
Bacteria; Bacteroidetes; Bacteroidia; Bacteroidales; Muribaculaceae; metagenome	16	0
Bacteria; Bacteroidetes; Bacteroidia; Bacteroidales; Prevotellaceae; Alloprevotella	60	7
Bacteria; Bacteroidetes; Bacteroidia; Bacteroidales; Prevotellaceae; NA	14	5
Bacteria; Bacteroidetes; Bacteroidia; Bacteroidales; Prevotellaceae; Prevotella 9	880	247
Bacteria; Bacteroidetes; Bacteroidia; Bacteroidales; Prevotellaceae; uncultured	32	0
Bacteria; Bacteroidetes; Bacteroidia; Bacteroidales; Rikenellaceae; Rikenellaceae RC9 gut group	17	2
Bacteria; Bacteroidetes; Bacteroidia; Chitinophagales; Saprospiraceae; NA	10	0
Bacteria; Bacteroidetes; Bacteroidia; Cytophagales; Cyclobacteriaceae; NA	12	0
Bacteria; Bacteroidetes; Bacteroidia; Cytophagales; Hymenobacteraceae; Pontibacter	11	0
Bacteria; Bacteroidetes; Bacteroidia; Sphingobacteriales; S15-21; uncultured bacterium	12	0
Bacteria; Chloroflexi; Chloroflexia; Thermomicrobiales; AKYG1722; NA	16	0
Bacteria; Chloroflexi; Chloroflexia; Thermomicrobiales; JG30-KF-CM45; NA	11	0
Bacteria; Chloroflexi; JG30-KF-CM66; NA; NA; NA	15	0
Bacteria; Chloroflexi; KD4-96; uncultured bacterium; uncultured bacterium; uncultured bacterium	13	0
Bacteria; Chloroflexi; TK10; NA; NA; NA	8	2
Bacteria; Cyanobacteria; Oxyphotobacteria; Chloroplast; NA; NA	1431	2
Bacteria; Entotheonellaeota; Entotheonellia; Entotheonellales; Entotheonellaceae; Candidatus Entotheonella	17	0
Bacteria; Epsilonbacteraeota; Campylobacteria; Campylobacterales; Arcobacteraceae; Arcobacter	103	0
Bacteria; Epsilonbacteraeota; Campylobacteria; Campylobacterales; Sulfurovaceae; Sulfurovum	17	0
Bacteria; Firmicutes; Bacilli; Bacillales; Bacillaceae; Bacillus	107	3
Bacteria; Firmicutes; Bacilli; Bacillales; Paenibacillaceae; Ammoniphilus	51	0
Bacteria; Firmicutes; Bacilli; Lactobacillales; Lactobacillaceae; Lactobacillus	48	12
Bacteria; Firmicutes; Clostridia; Clostridiales; Christensenellaceae; Christensenellaceae R-7 group	31	6
Bacteria; Firmicutes; Clostridia; Clostridiales; Clostridiaceae 1; Clostridium sensu stricto 1	182	97
Bacteria; Firmicutes; Clostridia; Clostridiales; Lachnospiraceae; [Eubacterium] eligens group	39	13
Bacteria; Firmicutes; Clostridia; Clostridiales; Lachnospiraceae; [Eubacterium] hallii group	1	28
Bacteria; Firmicutes; Clostridia; Clostridiales; Lachnospiraceae; Agathobacter	2119	958
Bacteria; Firmicutes; Clostridia; Clostridiales; Lachnospiraceae; Blautia	6	58
Bacteria; Firmicutes; Clostridia; Clostridiales; Lachnospiraceae; Dorea	55	40
Bacteria; Firmicutes; Clostridia; Clostridiales; Lachnospiraceae; Lachnospira	9	3
Bacteria; Firmicutes; Clostridia; Clostridiales; Lachnospiraceae; NA	209	79
Bacteria; Firmicutes; Clostridia; Clostridiales; Lachnospiraceae; Roseburia	225	89
Bacteria; Firmicutes; Clostridia; Clostridiales; NA; NA	162	0
Bacteria; Firmicutes; Clostridia; Clostridiales; Peptostreptococcaceae; NA	253	35
Bacteria; Firmicutes; Clostridia; Clostridiales; Ruminococcaceae; [Eubacterium] coprostanoligenes group	389	72
Bacteria; Firmicutes; Clostridia; Clostridiales; Ruminococcaceae; Faecalibacterium	259	115
Bacteria; Firmicutes; Clostridia; Clostridiales; Ruminococcaceae; NA	43	11
Bacteria; Firmicutes; Clostridia; Clostridiales; Ruminococcaceae; Ruminococcaceae NK4A214 group	47	25
Bacteria; Firmicutes; Clostridia; Clostridiales; Ruminococcaceae; Ruminococcaceae UCG-002	106	43
Bacteria; Firmicutes; Clostridia; Clostridiales; Ruminococcaceae; Ruminococcaceae UCG-003	13	0
Bacteria; Firmicutes; Clostridia; Clostridiales; Ruminococcaceae; Ruminococcaceae UCG-005	57	14
Bacteria; Firmicutes; Clostridia; Clostridiales; Ruminococcaceae; Ruminococcus 1	25	17
Bacteria; Firmicutes; Clostridia; Clostridiales; Ruminococcaceae; Subdoligranulum	91	36
Bacteria; Firmicutes; Erysipelotrichia; Erysipelotrichales; Erysipelotrichaceae; Catenibacterium	97	23
Bacteria; Firmicutes; Erysipelotrichia; Erysipelotrichales; Erysipelotrichaceae; Turicibacter	62	0
Bacteria; Firmicutes; Negativicutes; Selenomonadales; Veillonellaceae; Allisonella	21	2
Bacteria; Firmicutes; Negativicutes; Selenomonadales; Veillonellaceae; Dialister	1622	328
Bacteria; Firmicutes; Negativicutes; Selenomonadales; Veillonellaceae; Megamonas	14	18
Bacteria; Firmicutes; Negativicutes; Selenomonadales; Veillonellaceae; Megasphaera	169	67
Bacteria; Firmicutes; Negativicutes; Selenomonadales; Veillonellaceae; Mitsuokella	23	3
Bacteria; Gemmatimonadetes; BD2-11 terrestrial group; NA; NA; NA	23	0
Bacteria; Gemmatimonadetes; Gemmatimonadetes; Gemmatimonadales; Gemmatimonadaceae; Gemmatimonas	11	0
Bacteria; Gemmatimonadetes; Gemmatimonadetes; Gemmatimonadales; Gemmatimonadaceae; NA	98	2
Bacteria; Gemmatimonadetes; Gemmatimonadetes; Gemmatimonadales; Gemmatimonadaceae; uncultured	107	2
Bacteria; Gemmatimonadetes; Longimicrobia; Longimicrobiales; Longimicrobiaceae; NA	10	0
Bacteria; Gemmatimonadetes; Longimicrobia; Longimicrobiales; Longimicrobiaceae; uncultured bacterium	10	0
Bacteria; Gemmatimonadetes; PAUC43f marine benthic group; NA; NA; NA	10	0
Bacteria; Gemmatimonadetes; S0134 terrestrial group; NA; NA; NA	123	0
Bacteria; Gemmatimonadetes; S0134 terrestrial group; uncultured bacterium; uncultured bacterium; uncultured bacterium	53	0
Bacteria; Nitrospirae; Nitrospira; Nitrospirales; Nitrospiraceae; Nitrospira	54	0
Bacteria; Patescibacteria; Saccharimonadia; Saccharimonadales; NA; NA	12	0
Bacteria; Planctomycetes; vadinHA49; NA; NA; NA	13	0
Bacteria; Proteobacteria; Alphaproteobacteria; Acetobacterales; Acetobacteraceae; Acetobacter	24	0
Bacteria; Proteobacteria; Alphaproteobacteria; Azospirillales; uncultured; NA	38	0
Bacteria; Proteobacteria; Alphaproteobacteria; Caulobacterales; Hyphomonadaceae; SWB02	13	0
Bacteria; Proteobacteria; Alphaproteobacteria; NA; NA; NA	81	0
Bacteria; Proteobacteria; Alphaproteobacteria; Rhizobiales; Beijerinckiaceae; Microvirga	32	0
Bacteria; Proteobacteria; Alphaproteobacteria; Rhizobiales; Beijerinckiaceae; NA	10	0
Bacteria; Proteobacteria; Alphaproteobacteria; Rhizobiales; Rhizobiaceae; Cohaesibacter	19	0
Bacteria; Proteobacteria; Alphaproteobacteria; Rhizobiales; Rhizobiaceae; NA	9	3
Bacteria; Proteobacteria; Alphaproteobacteria; Rhodobacterales; Rhodobacteraceae; Actibacterium	40	0
Bacteria; Proteobacteria; Alphaproteobacteria; Rhodobacterales; Rhodobacteraceae; NA	540	0
Bacteria; Proteobacteria; Alphaproteobacteria; Rhodobacterales; Rhodobacteraceae; Nautella	16	0
Bacteria; Proteobacteria; Alphaproteobacteria; Rhodobacterales; Rhodobacteraceae; Pseudoruegeria	10	0
Bacteria; Proteobacteria; Alphaproteobacteria; Rhodobacterales; Rhodobacteraceae; Roseovarius	11	0
Bacteria; Proteobacteria; Alphaproteobacteria; Rhodobacterales; Rhodobacteraceae; Ruegeria	318	0
Bacteria; Proteobacteria; Alphaproteobacteria; Rhodovibrionales; Fodinicurvataceae; Fodinicurvata	36	0
Bacteria; Proteobacteria; Alphaproteobacteria; Rickettsiales; Mitochondria; NA	211	0
Bacteria; Proteobacteria; Alphaproteobacteria; Sphingomonadales; Sphingomonadaceae; Sphingomonas	127	0
Bacteria; Proteobacteria; Alphaproteobacteria; Tistrellales; Geminicoccaceae; uncultured	83	0
Bacteria; Proteobacteria; Deltaproteobacteria; Desulfovibrionales; Desulfovibrionaceae; Desulfovibrio	684	12
Bacteria; Proteobacteria; Deltaproteobacteria; Desulfovibrionales; Desulfovibrionaceae; Halodesulfovibrio	183	0
Bacteria; Proteobacteria; Deltaproteobacteria; Myxococcales; BIrii41; NA	11	0
Bacteria; Proteobacteria; Deltaproteobacteria; Myxococcales; BIrii41; uncultured bacterium	15	0
Bacteria; Proteobacteria; Deltaproteobacteria; Myxococcales; Haliangiaceae; Haliangium	33	0
Bacteria; Proteobacteria; Deltaproteobacteria; Myxococcales; Polyangiaceae; NA	11	0
Bacteria; Proteobacteria; Deltaproteobacteria; Myxococcales; Sandaracinaceae; uncultured	15	0
Bacteria; Proteobacteria; Deltaproteobacteria; NA; NA; NA	42	0
Bacteria; Proteobacteria; Gammaproteobacteria; Aeromonadales; Aeromonadaceae; Oceanisphaera	331	3
Bacteria; Proteobacteria; Gammaproteobacteria; Alteromonadales; Idiomarinaceae; Idiomarina	21	24
Bacteria; Proteobacteria; Gammaproteobacteria; Alteromonadales; Pseudoalteromonadaceae; Pseudoalteromonas	21647	12625
Bacteria; Proteobacteria; Gammaproteobacteria; Alteromonadales; Shewanellaceae; Shewanella	122	24
Bacteria; Proteobacteria; Gammaproteobacteria; Betaproteobacteriales; Burkholderiaceae; NA	12	0
Bacteria; Proteobacteria; Gammaproteobacteria; Betaproteobacteriales; Burkholderiaceae; Ralstonia	24	9
Bacteria; Proteobacteria; Gammaproteobacteria; Betaproteobacteriales; NA; NA	10	0
Bacteria; Proteobacteria; Gammaproteobacteria; Betaproteobacteriales; Nitrosomonadaceae; MND1	12	0
Bacteria; Proteobacteria; Gammaproteobacteria; Betaproteobacteriales; TRA3-20; uncultured Nitrosomonadales bacterium	16	0
Bacteria; Proteobacteria; Gammaproteobacteria; CCD24; NA; NA	46	0
Bacteria; Proteobacteria; Gammaproteobacteria; Chromatiales; Chromatiaceae; Marichromatium	19	0
Bacteria; Proteobacteria; Gammaproteobacteria; Enterobacteriales; Enterobacteriaceae; Escherichia-Shigella	41	21
Bacteria; Proteobacteria; Gammaproteobacteria; Enterobacteriales; Enterobacteriaceae; NA	4	19
Bacteria; Proteobacteria; Gammaproteobacteria; Gammaproteobacteria Incertae Sedis; Unknown Family; Acidibacter	15	0
Bacteria; Proteobacteria; Gammaproteobacteria; Gammaproteobacteria Incertae Sedis; Unknown Family; uncultured	15	0
Bacteria; Proteobacteria; Gammaproteobacteria; NA; NA; NA	313	75
Bacteria; Proteobacteria; Gammaproteobacteria; Oceanospirillales; Halomonadaceae; Cobetia	13139	37137
Bacteria; Proteobacteria; Gammaproteobacteria; Oceanospirillales; Halomonadaceae; Halomonas	1780	3388
Bacteria; Proteobacteria; Gammaproteobacteria; Pseudomonadales; Moraxellaceae; Psychrobacter	481	6
Bacteria; Proteobacteria; Gammaproteobacteria; Pseudomonadales; Pseudomonadaceae; Pseudomonas	52	0
Bacteria; Proteobacteria; Gammaproteobacteria; Steroidobacterales; Steroidobacteraceae; NA	31	0
Bacteria; Proteobacteria; Gammaproteobacteria; Steroidobacterales; Steroidobacteraceae; Steroidobacter	11	0
Bacteria; Proteobacteria; Gammaproteobacteria; Steroidobacterales; Steroidobacteraceae; uncultured	16	0
Bacteria; Proteobacteria; Gammaproteobacteria; Vibrionales; Vibrionaceae; NA	50	0
Bacteria; Proteobacteria; Gammaproteobacteria; Vibrionales; Vibrionaceae; Vibrio	5516	28
Bacteria; Proteobacteria; Gammaproteobacteria; Xanthomonadales; NA; NA	18	0
Bacteria; Proteobacteria; Gammaproteobacteria; Xanthomonadales; Xanthomonadaceae; Lysobacter	11	0
Bacteria; Proteobacteria; Gammaproteobacteria; Xanthomonadales; Xanthomonadaceae; NA	12	0
