# Supplementary material for: Microbial community structure and niche differentiation in healthy and infected samples of Kappaphycus alvarezii in the commercial farming sites of Tamil Nadu coastal, India
Source: Research Square preprint supplement (doi:10.21203/rs.3.rs-7621295/v1), 2025-09-30
Supplement: Supplementary file 2 [file a203a3c99b9062b4f74b59af.docx]

**Microbial community structure and niche differentiation in healthy and infected samples of *Kappaphycus alvarezii* in the commercial farming sites of Tamil Nadu coastal, India**

**Nagarajan Dhanya1,2, Balakrishnan Prakriti1,2, Arup Ghosh2,3, Lakkakula Satish1,2**

1Applied Phycology and Biotechnology Division, Marine Algal Research Station, Mandapam, CSIR - Central Salt and Marine Chemicals Research Institute, Tamil Nadu – 623519, India.

2Academy of Scientific and Innovative Research (AcSIR), Ghaziabad - 201002, India.

3Applied Phycology and Biotechnology Division, CSIR-Central Salt & Marine Chemicals Research Institute, Bhavnagar, 364002, Gujarat, India.

Correspondence: [satishl.csmcri@csir.res.in](mailto:satishl.csmcri@csir.res.in)

**Supplementary figures**


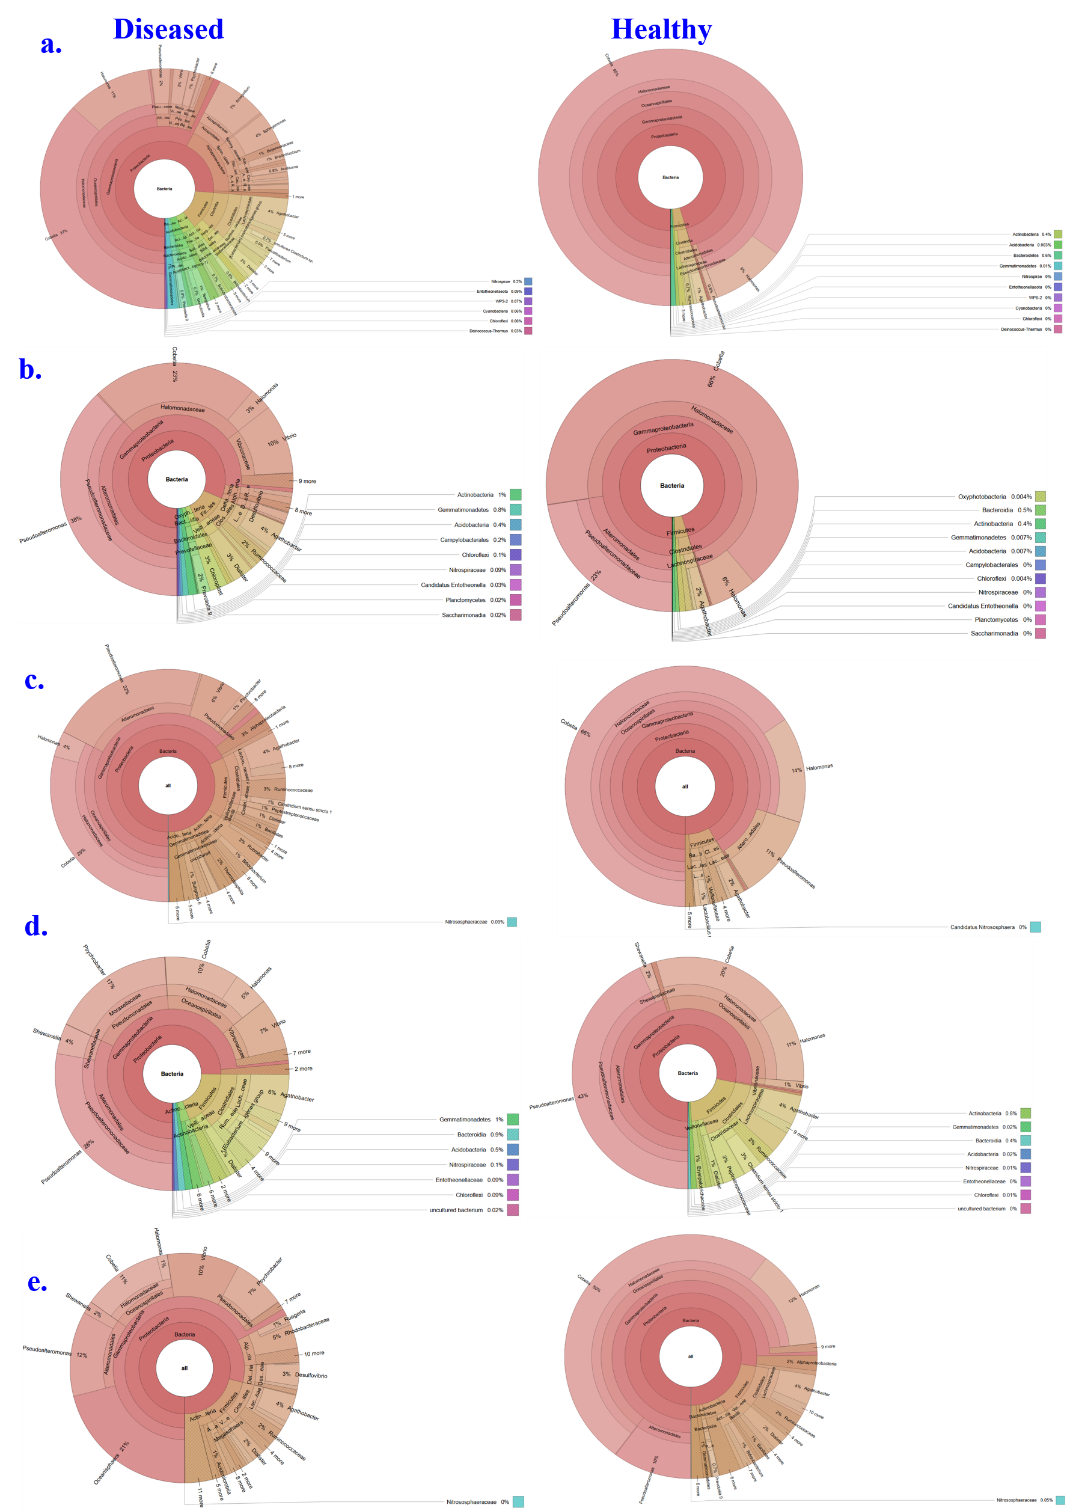


**Supplementary Figure 1:** Krona Chart. Shows the percentage of the domain, phylum, class, order and genus lever diversity in each of the diseased and healthy *K. alvarezii* samples from 5 different sites. a. Mangadu, b. soliyakudi, c. Nambuthalai, d. Jegathapattinam and e. Odavimadam. The phylum Proteobacteria has the highest abundance in healthy (70-95%) and diseased (<70%) samples, followed by Firmicutes and Actinobacteria, and the genus *Cobetia* followed by *Pseudoalteriomonas* shows the highest abundance.
